## An anti- $\alpha$ v-integrin antibody that blocks integrin function inhibits the development of a human melanoma in nude mice

Francesc Mitjans<sup>1</sup>, Diane Sander<sup>2</sup>, Jaime Adán<sup>1</sup>, Arne Sutter<sup>2</sup>, Josep M. Martinez<sup>1</sup>, Carlota-S. Jäggle<sup>2</sup>, Josep M. Moyano<sup>1</sup>, Hans-Georg Kreysch<sup>2</sup>, Jaime Piulats<sup>1</sup> and Simon L. Goodman<sup>2,\*</sup>

<sup>1</sup>Merck Farma y Quimica, Laboratorio de Bioinvestigación (LBI), Barcelona, Spain

<sup>2</sup>E. Merck, Pre Clinical Pharmaceutical Research - (SP), Frankfurterstrasse 250, 64217 Darmstadt, Germany

\*Author for correspondence (e-mail: simon.goodman@a1.emd.merck.dbp.de)

### SUMMARY

A series of murine monoclonal antibodies were raised against purified human  $\alpha$ v $\beta$ 3 integrin and against M21 human melanoma cells. Five notable hybridomas were identified by ELISA on purified integrins, and the isolated antibodies bound the  $\alpha$ v-chain. These antibodies, 17E6, 20A9, 23G5, 14D9.F8 and 10G2, recognised the extracellular domains of the integrin, and were shown to be reactive in FACS, immunoprecipitation, ELISA, and ELISA on fixed cells with M21, M21-L4, and UCLA-P3, but not with the  $\alpha$ v-deficient M21-L or M21-L-IIb (M21-L transfected with GpIIb integrin).

One antibody, 17E6, strongly perturbed cell attachment mediated by  $\alpha$ v integrins, reacting at least with  $\alpha$ v $\beta$ 3,  $\alpha$ v $\beta$ 5, and  $\alpha$ v $\beta$ 1, and strongly inhibiting cell attachment to  $\alpha$ v-ligands vitronectin and fibronectin with an IC<sub>50</sub> of ~0.1  $\mu$ g ml<sup>-1</sup>. Furthermore, 17E6 at this concentration could induce cell retraction from the substrate, while LM609 (anti- $\alpha$ v $\beta$ 3) and control antibody 14E2 (anti-200 kDa melanoma surface

protein) at 1,000-fold higher concentrations had minimal effects on cell morphology. The action of 17E6 was reversible and was not due to toxic effects: *in vitro* 17E6 at 0.1 mg ml<sup>-1</sup> did not affect either cell proliferation or DNA synthesis.

In two nude-mouse tumour models, subcutaneous tumour development and a lung colonisation ('experimental metastasis') assay, injection of 17E6 strongly inhibited tumour development, while isotype-matched controls had no effect. There was no obvious mechanism of cell or of complement-mediated tumour cytotoxicity; the antibody did not mediate ADCC or AECDC, or complement fixation. The data strongly support previous studies which have indicated the importance of  $\alpha$ v-integrins, and especially  $\alpha$ v $\beta$ 3, in the tumour progression of human melanoma.

Key words: integrin, melanoma, vitronectin, M21, cell-adhesion, tumour,  $\alpha$ v $\beta$ 3

### INTRODUCTION

New strategies for cancer treatment demand an understanding of the biology of the malignant phenotype. One crucial factor is an aberrant regulation of cell adhesion during tumour progression. The last decade has shown that integrins are major receptors involved in cell adhesion (Hynes, 1992; Sonnenberg, 1993) and so may be suitable targets for therapeutic intervention. In this study we have characterized antibody blockers of  $\alpha$ v-series integrins and reassessed the role of these integrins in melanoma progression.

With the exception of erythrocytes, all human cells express one or more integrin heterodimers. Their functions are regulated at many levels, but primarily their ligand specificity depends on which  $\alpha$ -chain associates with which  $\beta$ -chain in the heterodimer and on their activation state (Hynes, 1992; Diamond and Springer, 1994). The cellular background in which the integrins operate (Chan and Hemler, 1993) and the splice-variant form of the integrin which is used (Delwel et al., 1993) may also affect specificity. Given these complexities, one of the few reliable indications of integrin specificity is to

directly perturb integrin function and analyse resulting cellular behaviour. Thus, reagents that can specifically block integrin function have proved crucial, from the CSAT-antibody, which first defined an integrin  $\beta$ 1-chain (Neff et al., 1982), onward.

The  $\alpha$ v-series integrins are now seen to be a major subfamily, with both classical and novel functions. As well as classically mediating cell attachment and spreading (Pytela et al., 1985; Cheresch, 1991),  $\alpha$ v integrins are implicated in cell locomotion (Seftor et al., 1992), in ligand-receptor internalisation (Panetti and McKeown Longo, 1993a,b), as virus co-receptors (Wickham et al., 1993), in management of the extracellular protease cascades (de Boer et al., 1993), and as regulators of tumour progression (Felding-Habermann et al., 1992), angiogenesis (Brooks et al., 1994a) and apoptosis (Brooks et al., 1994b). The specificities of the five known  $\alpha$ v-series integrins,  $\alpha$ v $\beta$ 1 (Zhang et al., 1993; Marshall et al., 1995),  $\alpha$ v $\beta$ 3 (Pytela et al., 1985; Cheresch et al., 1987),  $\alpha$ v $\beta$ 5 (Cheresch et al., 1989),  $\alpha$ v $\beta$ 6 (Busk et al., 1992) and  $\alpha$ v $\beta$ 8 (Moyle et al., 1991), have been defined and they exclusively recognise ligands via the tripeptide sequence RGD- (NH<sub>2</sub>-arginine-glycine-aspartic acid-COOH), including vitronectin

( $\alpha v\beta 1$ ,  $\alpha v\beta 3$ ,  $\alpha v\beta 5$ ), fibronectin ( $\alpha v\beta 1$ ,  $\alpha v\beta 5$ ,  $\alpha v\beta 6$ ), and von Willebrand factor, fibrinogen and osteopontin ( $\alpha v\beta 3$ ) (Smith et al., 1990; Charo et al., 1990; Cheng et al., 1991; Busk et al., 1992; Zhang et al., 1993; Denhardt and Guo, 1993; Smith and Cheresh, 1990; Pytela et al., 1985). Dimers with related specificities may be co-expressed on the same cell, but may control independent functions (e.g.  $\alpha v\beta 3$  and  $\alpha v\beta 5$  - for vitronectin on melanoma cells) (Wayner et al., 1991). However, the overlapping ligand specificities within the  $\alpha v$ -family itself and also between  $\alpha v$ - and  $\beta 1$ -series integrins, means that the assignment of function to a defined receptor has to occur within a particular cellular environment. Function blocking antibodies have been vital in clarifying the function of  $\alpha v\beta 3$  (Cheresh and Spiro, 1987; Chuntharapai et al., 1993) and  $\alpha v\beta 5$  (Wayner et al., 1991). However, for the other  $\alpha v$ -integrins, no antibodies which specify the complex and perturb function are known. In particular, few reagents that specify the  $\alpha v$ -chain, and which strongly perturb integrin function of the  $\alpha v$ -family (as antibodies AIB2 and P4C10 perturb all  $\beta 1$ -series integrins) are available.

We have been interested in the function of  $\alpha v$ -series integrins in tumour development. Human malignant melanoma is an increasingly prevalent and aggressive skin cancer. Elevated levels of integrins  $\alpha 2\beta 1$  (Danen et al., 1993; Etoh et al., 1992),  $\alpha 3\beta 1$  (Natali et al., 1993; Yoshinaga et al., 1993),  $\alpha 4\beta 1$  (Hart et al., 1991), and  $\alpha 6\beta 1$  (Hart et al., 1991) have been correlated with melanoma progression, but the integrins most consistently implicated are those of the  $\alpha v$ -series. In particular, both vertical progression of the primary melanoma and distant metastases are characterized histologically by an increased expression of  $\alpha v\beta 3$  integrin. Primary non-invasive tumours and non-malignant melanotic nevi express little  $\alpha v\beta 3$ , and it is also rare in healthy adult tissue (Buck et al., 1990; Korhonen et al., 1991; Lessey et al., 1992; Pignatelli et al., 1992; Nesbitt et al., 1993; Brooks et al., 1994a). Immunohistochemistry of staged tumours and metastases showed a progressive increase in  $\alpha v\beta 3$  with invasive stage (Albelda et al., 1990; Si and Hersey, 1994). Screening of melanoma cell lines uniformly reveals a high expression of  $\alpha v$ -series integrins (Marshall et al., 1991; Sanders et al., 1992; Gehlsen et al., 1992) (and our unpublished observation).

Studies *in vivo* also implicate  $\alpha v\beta 3$  in melanoma development. In the murine B16F10 melanoma system, experimental lung metastasis could be suppressed by high levels of RGD-peptides, blockers of  $\alpha v$ -integrin function (Humphries et al., 1986; Hardan et al., 1993). More recently, Felding-Habermann and colleagues have shown that the presence of  $\alpha v$  integrins correlates with enhanced subcutaneous tumour growth of M21 human melanoma in immune-deficient mice (Felding-Habermann et al., 1992). The M21 suite of cells express various  $\alpha v$ -series integrins (Cheresh and Spiro, 1987; Kieffer et al., 1991; Felding-Habermann et al., 1992). The parent, M21, expresses  $\alpha v\beta 3$  and  $\alpha v\beta 5$  (Wayner et al., 1991): it attaches to vitronectin and grows as a subcutaneous tumour. M21-L, a somatic variant of M21, has no detectable  $\alpha v$  (Cheresh and Spiro, 1987): it cannot bind vitronectin and develops slow growing tumours. M21-L4 is a transfectant of M21-L, stably re-expressing a full length  $\alpha v$ -chain: it binds vitronectin and grows rapidly as a subcutaneous tumour (Felding-Habermann et al.,

1992). Thus, the presence of  $\alpha v$  integrins is correlated with M21 subcutaneous growth. However, interpretations of these data must also consider the selection pressures to which M21 was subjected during the establishment of the variant lines M21-L and M21-L4.

Therefore, in this study, we have attempted to directly block the function of  $\alpha v$ -integrins on the native M21 population and investigated the effect on cell behaviour and tumour development. We chose not to use peptidic antagonists because of their poor bioavailability, short half-life *in vivo*, and rapid clearance (Humphries et al., 1988). Syngeneic antibodies offer an attractive experimental alternative to peptides. They have a long half-life *in vivo* (Tao and Morrison, 1989; Haba et al., 1985) and their binding specificities can be demonstrated by standard techniques. Unfortunately, although there are excellent  $\alpha v$ -specific antibodies, there are few that block  $\alpha v$ -integrin functions (Cheresh and Spiro, 1987; Lehmann et al., 1994).

Here we characterise a group of antibodies against  $\alpha v$ , including an effective class-specific blocking antibody, 17E6. Amongst its other interesting properties, 17E6 has the ability to disrupt stable interaction between vitronectin and  $\alpha v\beta 3$ , and blocks the growth of M21 tumours in nude mice. This is to our knowledge the first report of an antibody that reverses  $\alpha v$ -integrin-ligand interaction. The data support earlier work in the M21 system, and confirm that  $\alpha v$ -blockade can severely disrupt the development of a tumour. The implications for therapy are discussed.

## MATERIALS AND METHODS

### Miscellaneous methods

#### Animals

Mice for antibody production (female Balb/c; 8 weeks old) and for tumour models ('nude mice': female homozygotic athymic Balb/c nu/nu; 4-5 weeks old) were from Criffa (Barcelona, Spain). Newborn Balb/c mice for microglial preparations were from our own colony. Nude mice were maintained in a sterile room in micro-isolator cages, and were given sterilised food and water *ad libitum*. All manipulations were performed in a laminar flow hood.

#### Proteins

Fibronectin (Ruoslahti et al., 1982) and vitronectin (Yatohgo et al., 1988) were purified from fresh frozen human plasma, and fibrinogen (Kazal et al., 1963) from whole blood. Murine laminin was purified from Engelbreth-Holm-Swarm tumours (Paulsson et al., 1987).

Where not otherwise stated, all manipulations were done at 20°C, and all washings were with calcium-magnesium-free PBS. 'PBS++' is PBS with added 1 mM MgCl<sub>2</sub> and 1 mM CaCl<sub>2</sub>.

#### Cell lines and cultures

American Type Culture Collection (ATCC) supplied SW1116, HT-29 human carcinomas, A375 human melanoma and Malme-3 human fibroblasts, while other human cell lines were the generous gift of colleagues: M21 melanoma, M21-L, M21-L12 and M21-L4 (Cheresh and Spiro, 1987), M21-L-IIb, prepared according to the method of Kieffer et al. (1991), and the UCLA-P3 human lung adenocarcinoma (Cheresh et al., 1989) (Dr D. A. Cheresh; Scripps), WM793 and WM164 melanoma (Herlyn et al., 1990) (Dr M. Herlyn; Wistar). NP18, pancreatic carcinoma (Dr G. Capellà; Hospital Sant Pau, Barcelona). B16F10 murine melanoma originally from Dr I. Fidler (Poste et al., 1980) (Dr S. Aliño; University of Valencia). EMM31 was established in our group from a tumour specimen defined by standard histological criteria as a primary melanoma (Jäggle et al.,

unpublished data). All cells were cultured at 37°C in 7.5% CO<sub>2</sub> 92.5% air in 90% RPMI 1640, 10% fetal calf serum (FCS) plus 2 mM L-glutamine and antibiotics. Unless otherwise stated, cells were routinely passaged and harvested by treatment with EDTA (0.02% in PBS). Cell lines were consistently free of mycoplasma as evaluated by Mycotect (Gibco). Microglial cells were prepared from Balb/c mice (Sutter et al., 1991).

#### Cell attachment assays

As previously described, using hexosaminidase activity to detect attached cells (Landegren, 1984; Goodman et al., 1991). Dilutions and cell suspensions were made in attachment buffer (RPMI, 1% BSA, 25 mM HEPES, pH 7.4). Matrix proteins were coated onto 96- or 48-well plates, the wells were blocked with BSA and serially diluted antibodies were added followed by cells ( $2.5 \times 10^4$ – $5 \times 10^4$ ). After 1 hour at 37°C, non-adherent cells were washed away and attached cells counted against a standard curve run in parallel. Inhibition of attachment was calculated by using wells with no added antibodies as reference. Typically, over 70% of added cells had attached to vitronectin after 1 hour. Cell attachment to wells coated with BSA alone was routinely less than 5% of specifically attached cells.

#### Attachment reversal assay

Cells were plated in attachment buffer on wells coated and blocked as for cell attachment assays, and incubated at 37°C. After 1 hour, serially diluted antibodies were added. Alternatively, the cells were allowed to attach for 24 hours before addition of antibodies. After 2–3 hours at 37°C, the supernatants were removed and replaced 5 times by fresh, pre-warmed attachment buffer - resulting in a dilution factor of  $>1 \times 10^5$  - and incubation continued.

#### Antibodies

Monoclonal antibody (mAb) fusions, ELISA screening, subcloning and maintenance of cultures were all performed using standard technologies (Harlow and Lane, 1988) unless otherwise specified.

#### Immunization

mAbs against the  $\alpha$ v $\beta$ 3 were produced by intraperitoneal (ip) injection of purified placental  $\alpha$ v $\beta$ 3 immobilised on Sepharose (80  $\mu$ g  $\alpha$ v $\beta$ 3 on 80  $\mu$ l Sepharose in 200  $\mu$ l PBS) or of live M21 cells ( $1 \times 10^6$  cells in 0.5 ml PBS) every two weeks over twelve weeks. Four days after the last injection, PEG-induced fusion was performed using Friendly Myeloma (Ventrex) as partner. Antibodies to a 200 kDa melanoma-associated surface protein were produced by immunisation with intact M21 cells ( $1 \times 10^6$  cells in 0.5 ml PBS) and served as controls.

#### Screening

ELISA on receptors and on fixed M21 cells was used. For receptor ELISA, 96-well ELISA plates (Dynatech) were coated with purified  $\alpha$ v $\beta$ 3 (1  $\mu$ g ml<sup>-1</sup> in PBS, 16 hours, 4°C), blocked (1.5% skimmed milk in PBS, 1 hour, 37°C) and incubated with hybridoma supernatants. Bound immunoglobulins were detected with alkaline-phosphatase conjugated anti-mouse Ig (Dako) using *p*-nitrophenyl-phosphate as substrate. For cellular ELISA, M21 or M21-L, M21-L-IIB or UCLA-P3 cells on 96-well tissue culture plates were fixed (4% paraformaldehyde in PBS, 15 minutes, 20°C) and blocked (3% BSA, PBS, 1 hour, 4°C) before incubation with hybridoma supernatants and detection as in receptor ELISA. Positive hybridomas were subcloned three times by limiting dilution and adapted to RPMI medium. Immunoglobulin isotype was determined using isotype-specific heavy-chain antibodies (Zymed) or light-chain antibodies (Promega).

Other murine mAbs used in the studies were the gift of our colleagues: LM609 to  $\alpha$ v $\beta$ 3 and LM142 to  $\alpha$ v (Cheresh and Spiro, 1987) (Dr D. A. Cheresh; Scripps), and P5H9 to  $\alpha$ v $\beta$ 5 integrin complex (Wayner et al., 1991) (Dr E. Wayner, University of Minnesota), B5-

1A9 to  $\beta$ 5 (Pasqualini and Hemler, 1994) (Dr M. Hemler; Dana Farber), CP8 to  $\alpha$ IIb $\beta$ 3 complex (Dr Ruggieri; Scripps), 9.2.27 against a melanoma cell surface proteoglycan (Harel et al., 1990) and 14.18G2a against ganglioside GD2 (Mujoo et al., 1989) (Dr R. Reisfeld; Scripps). In addition, AP3 to the  $\beta$ 3 chain (Furihata et al., 1987) (ATCC) and P4C10 to  $\beta$ 1 integrin (Carter et al., 1990) (Telios) were used.

#### Antibody purification and scaling up

For large scale purification, hybridoma supernatants were harvested from exponential phase cultures grown in roller bottles. The antibodies purified on Protein A-Sepharose CL-4B (Pharmacia) were dialysed against PBS before sterile filtration and storage at -70°C (Harlow and Lane, 1988). Purified antibodies were freed of endotoxins by passage over Kurimover-II columns (Kurita-Vater; Tokyo). This reduced the endotoxin levels to  $<0.2$  i.u. mg<sup>-1</sup> in the *Limulus* assay (Melvaer and Fystro, 1982).

#### $\alpha$ v $\beta$ 3 and $\alpha$ IIb $\beta$ 3 integrin purifications

$\alpha$ v $\beta$ 3 was purified from human placenta (Smith and Cheresh, 1988). Term placenta was minced in ~2 vols ice cold solution A (0.05% (w/v) digitonin, 2 mM CaCl<sub>2</sub>, 2 mM PMSF, pH 7.4), then filtered. The retained material was extracted in ~4 vols ice cold buffer B (100 mM octyl- $\beta$ -D-glucopyranoside (OG), 1 mM CaCl<sub>2</sub>, 2 mM PMSF, in PBS) and centrifuged (12,000 g<sub>max</sub>, 45 minutes, 4°C). The supernatant was re-circulated over an LM609 antibody column (16 hours, 4°C). After washing with buffer C (0.1% NP-40 in PBS, ~10 column volumes (cv)) and buffer D (0.1% NP-40, 2 mM CaCl<sub>2</sub>, 10 mM Na-acetate, pH 4.5, ~10 cv), bound material was eluted with buffer E (buffer D adjusted to pH 3.1). The eluant was neutralized with 3 M Tris (pH 8.8), dialysed against buffer C, and concentrated ~10x using Aquacide II (Calbiochem). The purified receptor was stored at -70°C.

$\alpha$ IIb $\beta$ 3 was prepared from human platelets (Pytela et al., 1986). Outdated platelet concentrates were mixed with one volume of Tyrodes buffer, pelleted (1,200 g<sub>max</sub>) and the pellet extracted (1 hour, 20°C) with lysis buffer (50 mM OG, 1 mM MgCl<sub>2</sub>, 1 mM CaCl<sub>2</sub>, 1 mM MnCl<sub>2</sub>, 2 mM PMSF, 150 mM NaCl, 50 mM Tris-HCl, pH 7.4). After centrifugation (32,000 g<sub>max</sub>, 30 minutes, 4°C) the supernatant was re-circulated (16 hours, 4°C) over a GRGDSPK-conjugated CL-4B Sepharose column. The column was washed with lysis buffer (~10 cv) and eluted with the GRGDSPK (3 mg ml<sup>-1</sup> in 90% lysis buffer, 10% DMSO). The peak was concentrated ~5-fold, dialysed against modified lysis buffer (0.1% NP-40 substituted for OG) and stored at -70°C.

The integrin preparations were ~95% pure as judged by anti-integrin ELISA using  $\alpha$ - and  $\beta$ -chain specific monoclonal antibodies and by SDS-PAGE.

#### Cell surface labelling and immune-characterisations

##### Cell surface biotinylation and extraction

Cells in exponential growth were harvested, washed and  $5 \times 10^6$  cells in PBS (1 ml) were surface-labelled with biotin-*N*-hydroxysuccinimido ester (10  $\mu$ g ml<sup>-1</sup>; Sigma) on an end-over-end rotator (2 hours, 20°C), washed, and  $5 \times 10^6$  cells per millilitre were lysed for 1 hour at 20°C in extraction buffer (100 mM OG, 2 mM CaCl<sub>2</sub>, 1 mM MgCl<sub>2</sub> and 1 mM PMSF in PBS). After centrifugation (12,000 g, 20 minutes) the supernatant was used for immunoprecipitation.

##### Immunoprecipitation

Extracts from biotinylated cells were immunoprecipitated with anti-integrin mAbs purified over Protein A-Sepharose and coupled to Affigel-10 beads (Bio-Rad), or bound to Protein G-Sepharose (Pharmacia). Coupled mAb was incubated with  $5 \times 10^6$  cell equivalents of biotinylated cell extracts overnight at 4°C. Washed beads were boiled in non-reducing SDS-sample buffer, centrifuged and resolved on 7.5% SDS-PAGE. After electrophoretic transfer to nitrocellulose (Towbin et al., 1979), bands were visualized with goat anti-biotin

**Table 1. Reaction pattern of monoclonal antibodies in ELISAs and CELISAs**

| Antibody       | Immunogen          | Isotype         | $\alpha v \beta 3$ | $\alpha IIb \beta 3$ | M21 | M21-L | M21-L-IIb | UCLA-P3 | Specificity          |
|----------------|--------------------|-----------------|--------------------|----------------------|-----|-------|-----------|---------|----------------------|
| <b>17E6</b>    | $\alpha v \beta 3$ | IgG1/ $\kappa$  | +                  | -                    | +   | -     | -         | +       | $\alpha v$           |
| <b>20A9</b>    | M21                | IgG1/ $\kappa$  | +                  | -                    | +   | -     | -         | +       | $\alpha v$           |
| <b>23G5</b>    | M21                | IgG1/ $\kappa$  | +                  | -                    | +   | -     | -         | +       | $\alpha v$           |
| <b>14D9.F8</b> | M21                | IgG1/ $\kappa$  | +                  | -                    | +   | -     | -         | +       | $\alpha v$           |
| <b>10G2</b>    | M21                | IgG1/ $\kappa$  | +                  | -                    | +   | -     | -         | +       | $\alpha v$           |
| <b>14E2</b>    | M21                | IgG1/ $\kappa$  | -                  | -                    | +   | +     | +         | -       | 200 kDa              |
| <b>21H6</b>    | M21                | IgG2a/ $\kappa$ | -                  | -                    | +   | +     | +         | -       | 200 kDa              |
| <i>LM609</i>   |                    | IgG1/ $\kappa$  | +                  | -                    | +   | -     | -         | -       | $\alpha v \beta 3$   |
| <i>LM142</i>   |                    | IgG1/ $\kappa$  | +                  | -                    | +   | -     | -         | +       | $\alpha v$           |
| <i>P5H9</i>    |                    | IgG1/ $\kappa$  | -                  | -                    | +   | -     | -         | +       | $\alpha v \beta 5$   |
| <i>CP8</i>     |                    | IgG1/ $\kappa$  | -                  | +                    | -   | -     | +         | -       | $\alpha IIb \beta 3$ |
| <i>P4C10</i>   |                    | IgG1/ $\kappa$  | -                  | -                    | +   | +     | +         | +       | $\beta 1$            |
| <i>AP3</i>     |                    | IgG1/ $\kappa$  | +                  | +                    | +   | -     | +         | -       | $\beta 3$            |

Antibodies were compared in ELISA and cell ELISA (CELISA). Reagents and specificities are discussed fully in text. +, antibodies bind; -, antibodies do not bind. The antibodies characterized in this study are in bold, standard reagent antibodies are italicised. Immunogen:  $\alpha v \beta 3$  = immobilized human placental integrin  $\alpha v \beta 3$ . M21 = viable M21 cells. Purified  $\alpha v \beta 3$  and  $\alpha IIb \beta 3$  were immobilized on 96-well plates for ELISA. The cell lines M21, M21-L and M21-L-IIb, and UCLA-P3 were grown and fixed on the plates and tested for antibody reactivity in CELISA. Specificity: (See text)  $\alpha v$  =  $\alpha v$  chain of mammalian integrins. 200 kDa = unknown 200,000 Da surface protein of melanoma cells.  $\alpha v \beta 5$  = integrin  $\alpha v \beta 5$ .  $\beta 1$  = integrin  $\beta 1$  chain.  $\beta 3$  = integrin  $\beta 3$  chain.

alkaline phosphatase conjugate (Dako) using NBT-BCIP (Bio-Rad) as substrate.

#### Flow cytometry

Cells were harvested, washed, and  $10^6$  cells in PBS-1% BSA were incubated with mAb ( $10 \mu\text{g ml}^{-1}$ , 15 minutes,  $4^\circ\text{C}$ ). After washing and labelling (15 minutes,  $4^\circ\text{C}$ ) with goat anti-mouse Ig-FITC (Becton-Dickinson), cells were resuspended in propidium iodide ( $5 \mu\text{g ml}^{-1}$  in PBS) before flow cytometric analysis (FACScan, Becton-Dickinson). Living cells were gated on the basis of their side and forward scatter and of propidium iodide fluorescence. Fluorescein was excited with an argon ion laser (488 nm) and the emitted fluorescence (525 nm) was recorded. In some experiments, M21-L cells were stained following fixation and permeabilization (70% ethanol, 5 minutes,  $-20^\circ\text{C}$ ).

#### Complement dependent cytotoxicity (CDC)

M21 cells (10,000) were plated in a 96-well plate in 50  $\mu\text{l}$  of complete medium and 20  $\mu\text{l}$  of antibodies. 50  $\mu\text{l}$  rabbit serum (Behring) diluted 1:5 in medium was added as source of complement and the plate was

incubated (60 minutes,  $37^\circ\text{C}$ ). Lysis was quantified by the MTT technique (Mosmann, 1983). The percentage of lysis was calculated using wells with 1% Tween-20 as 100% lysed controls, and without antibody as 0% lysed control.

#### Cell growth, viability and activation

##### Proliferation assays

In order to test for toxic antibody effects,  $10^6$  cells were incubated in the presence of mAbs ( $70 \mu\text{g ml}^{-1}$  in PBS, 1 hour,  $20^\circ\text{C}$ ) on an end-over-end rotator, washed, then resuspended and further cultured in RPMI-medium. Growth and viability were estimated by trypan blue dye exclusion. Activation was measured by the MTT assay (above) or by [ $^3\text{H}$ ]thymidine incorporation (below) and cell numbers were counted daily using a cell counter (Coulter).

Melanoma cells were seeded into 96-well flat-bottom microtest plates ( $1 \times 10^4$  cells per well) and cultured without (control) or in the presence of serially diluted antibodies in RPMI medium with 10% FCS. After 48 hours, cells were pulse labelled for 18 hours (18.5 kBq [ $^3\text{H}$ ]thymidine per well), harvested, and incorporated nuclear [ $^3\text{H}$ ]label was measured.

**Fig. 1.** FACS analysis of the alpha-v group antibody binding on M21 and M21-L human melanoma cells. Cells were indirectly labelled with antibodies. Propidium iodide was added and 15,000 cells per sample were acquired and analysed after gating. The open peak represents the binding of the fluorescently-labelled second layer antibody alone. The closed peak, the intensity of the primary and secondary together. Vertical axis shows cell number, horizontal axis shows log fluorescence intensity. M21 express surface  $\alpha v$  integrin, whereas M21-L does not. The pattern of staining for the alpha-v group antibodies (17E6, 20A9, 23G5, 14D9.F8) closely matches the LM142 ( $\alpha v$ -specific) and LM609 ( $\alpha v \beta 3$ -specific) staining. They bind M21 but not M21-L cells. Antibody 9.2.27 reacts with a melanoma proteoglycan. 14E2 and 21H6 recognise a 200 kDa melanoma surface protein. Their staining patterns are discrete from those of the alpha-v group and similar for both cell lines.

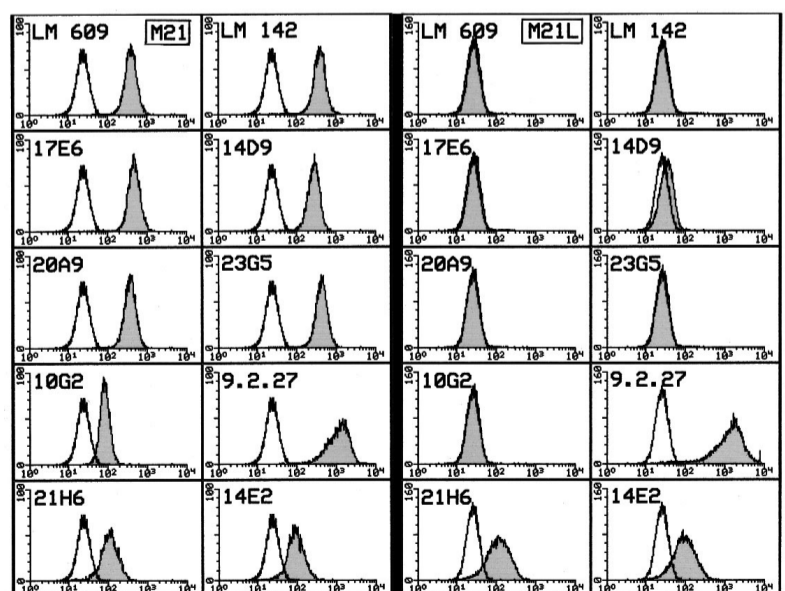

**Table 2. Summary of monoclonal antibody reactivity in flow cytometry**

| Antibody | Specificity | Test cell<br>⇒             | M21           | M21-L | M21-L (p) | M21-L-IIb | M21-L4        | M21-L12 | UCLA-P3 | WM793         |
|----------|-------------|----------------------------|---------------|-------|-----------|-----------|---------------|---------|---------|---------------|
|          |             | αv-<br>Integrin<br>pattern | αvβ3;<br>αvβ5 | (β3)* | (β3)*     | αIIbβ3    | αvβ3;<br>αvβ5 | (β3)*   | αvβ5    | αvβ3;<br>αvβ5 |
| 17E6     | αv          |                            | ++            | -     | -         | -         | ++            | -       | +++     | +++           |
| 20A9     | αv          |                            | ++            | -     | -         | -         | ++            | -       | +++     | +++           |
| 23G5     | αv          |                            | ++            | -     | -         | -         | ++            | -       | +++     | +++           |
| 14D9.F8  | αv          |                            | ++            | -     | -         | -         | ++            | -       | +++     | +++           |
| 14E2     | 200 kDa     |                            | ++            | ++    | ++        | ++        | ++            | ++      | -       | +++           |
| LM609    | αvβ3        |                            | ++            | -     | -         | -         | +             | -       | -       | ++            |
| LM142    | αv          |                            | +++           | -     | -         | -         | ++            | -       | +++     | +++           |
| P5H9     | αvβ5        |                            | +             | -     | -         | -         | +             | -       | +++     | +             |
| P4C10    | β1          |                            | ++            | ++    | ++        | ++        | ++            | ++      | ++      | ++            |
| AP3      | β3          |                            | ++            | -     | ++        | ++        | +             | +       | -       | +             |
| CP8      | αIIbβ3      |                            | -             | -     | -         | ++        | -             | -       | -       | -             |

Levels of reactivity relative to control (secondary antibody only) were graded as follows: 1-2 (-), 2-4 (+), 4-9 (++), >9 (+++). For example, on M21, the relative fluorescent intensity of the control was typically 30-50 units (-), and that of LM142 binding was 300-500 units, giving mean relative reactivity around 10 (400/40) (+++). (p) M21-L was permeabilized with 70% ethanol at -20°C.

\*M21-L has intracellular pools of β3 chain of αvβ3 integrin.

**Antibody-dependent cellular cytotoxicity assays (ADCC)**

Conditions for ADCC were essentially as described (Sutter et al., 1991). M21 cells in logarithmic growth were pulsed for 24 hours with [<sup>3</sup>H]thymidine (73 kBq ml<sup>-1</sup>), purged with EDTA (0.1% in PBS, 7 minutes), and incubated on 96-well plates together with microglia (5×10<sup>4</sup> cells per well) in 200 μl DMEM/FCS (10%) in the presence of antibodies. After 48 hours [<sup>3</sup>H]label retained in the nuclear com-

partment of target cells was measured. mAb dependent cytotoxicity was calculated using the formula:

$$\% \text{ cytotoxicity} = 100 \times [(A-B)/A],$$

where A = counts per minute in M21 cells cultured alone; B = counts per minute in M21 cells cultured with microglia and/or antibodies.

**Fig. 2.** The alpha-v group antibodies immunoprecipitate similar proteins. Viable M21 melanoma (A) were surface labelled, extracted with detergent, and immunoprecipitated and resolved on a non-reducing 7.5% SDS-PAGE gel. Migration of standards (weights in kDa) are indicated to the left. Precipitation was with the control antibodies LM142 (anti-αv: lane a) and LM609 (anti-αvβ3: lane b), and 21H6 (lane c), 10G2 (lane d), 20A9 (lane e), 23G5 (lane f), 17E6 (lane g), 14D9 (lane h), and 14E2 (lane i). LM142 and LM609 precipitate a similar pattern of proteins to 10G2, 20A9, 23G5, and 17E6, while 21H6 and 14E2 precipitate a band at ~200 kDa. 14D9 precipitates both patterns. M21 melanoma (B), M21-L αv-deficient melanoma (C), and UCLA-P3 cells (D) were cell-surface labelled and immunoprecipitated. Precipitation was with antibodies LM142 (anti-αv: lane a), LM609 (anti-αvβ3: lane b), 17E6 (lane c), 20A9 (lane d), AP3 (anti-β3: lane e), P4C10 (anti-β1: lane f), and B5-1A9 (anti-β5: lane g). Positions of molecular weight markers are shown as small arrows to left of the panel, with weights in kDa (shown in C). The position of αv (open arrow), β1, β5, β3, (closed arrows) and ~200 kDa chains is indicated to the right of each panel. Note the β3 chain precipitated from M21-L cells (lane e) permeabilized during surface labelling.

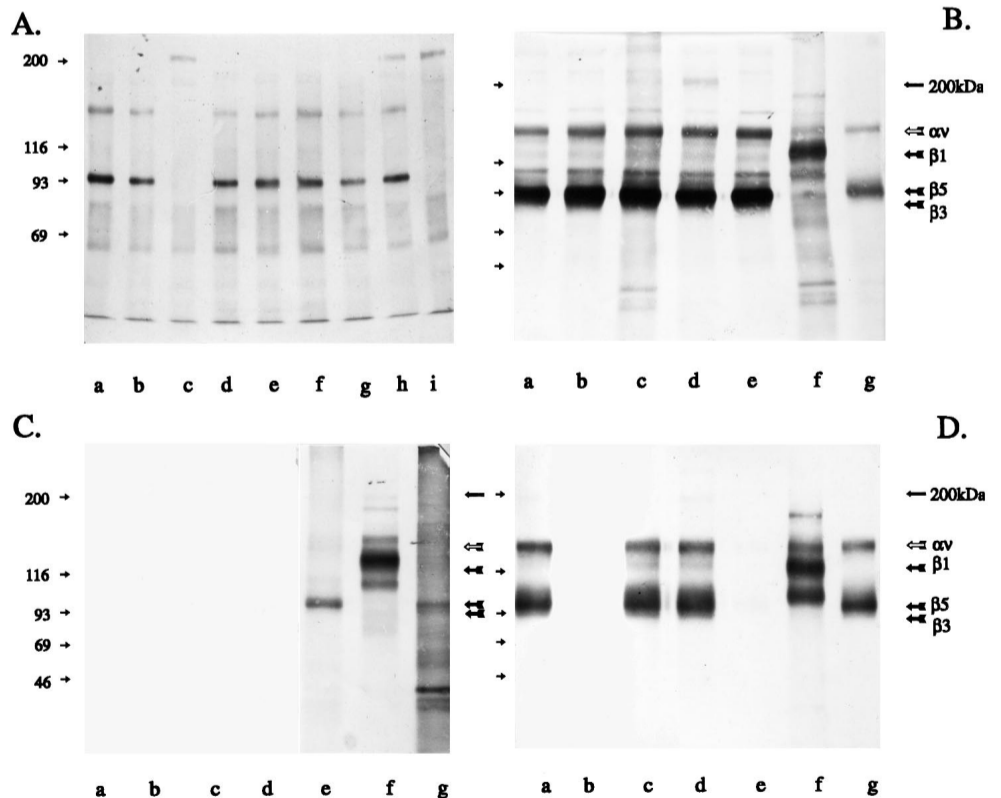

### Antibody and effector cell-dependent cytostasis (AECDC)

As for ADCC, but instead of pulsed cells, freshly passed unlabelled M21 cells were used. After 24 hours the effector-target cell co-cultures were pulsed with [<sup>3</sup>H]thymidine (18 kBq per well) for an additional 24 hours and the incorporated nuclear [<sup>3</sup>H] label measured.

### In vivo tumour development

Tumour cells in logarithmic growth were harvested, washed and examined for viability by trypan blue dye exclusion. Viability was between 96-99%. For primary tumour growth, cells (0.1-1.0×10<sup>6</sup> in 0.2 ml PBS) were injected subcutaneously into the flanks of nude mice. A minimum of eight animals were used per group. Tumour growth was followed by measuring tumour diameters with callipers and the tumour volume was calculated using an approximated formula for a prolate ellipsoid:

$$\text{volume} = [(a \cdot b^2)/2],$$

where *a* is the longest axis of the tumour and *b* the shortest.

For lung colonisation assays ('experimental metastasis'), cells were harvested and injected into the tail vein of nude mice (0.1-1.0×10<sup>6</sup> in 0.2 ml PBS). After 7 weeks the animals were killed, the lungs removed and fixed in a Bouins' solution, and the tumour foci on the surface of the lungs counted.

For antibody treatment, harvested and washed cells were incubated with purified endotoxin-free mAbs (175 µg ml<sup>-1</sup> in 0.4 ml PBS) for 30 minutes at 20°C in an end-over-end rotator before injection (in 0.2 ml PBS). In some experiments, the antibodies were injected intraperitoneally shortly before or after cell injection. This did not affect the

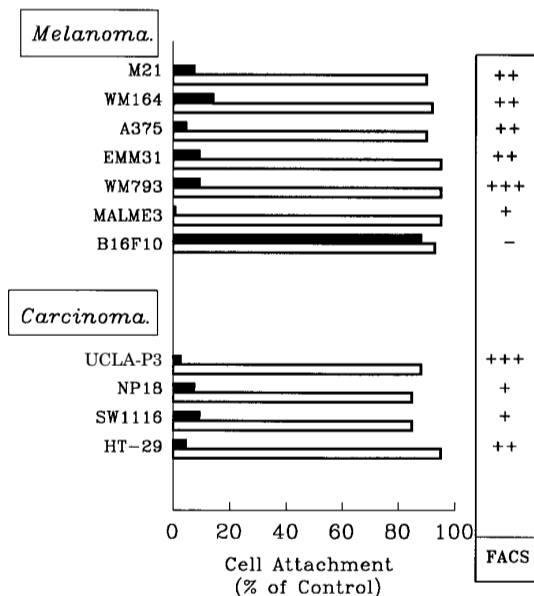

**Fig. 3.** 17E6 inhibits initial cell attachment to vitronectin. A series of melanoma cell lines and carcinoma cell lines were screened by FACS for reactivity with 17E6 mAb. FACS intensities were determined as described in Table 2. The cells were also allowed to attach to vitronectin-coated substrates (0.5 µg ml<sup>-1</sup> coating) in the presence of hybridoma supernatants from 14E2 (open bars) or 17E6 (filled bars). Attached cells were counted and the data normalised to attachment in the absence of antibodies (100%). All cells were of human origin except B16F10 (murine melanoma). Malme-3 is a human fibroblast line. Absolute percentage of cells attached in the absence of antibodies was for M21 (70%), WM164 (68%), A375 (75%), EMM31 (67%), WM793 (65%), Malme-3 (67%), B16F10 (70%), UCLA-P3 (76%), NP-18 (65%), SW1116 (68%), HT-29 (65%).

results. For consistency, only data from co-incubation experiments is reported. There was no significant difference in cell viability, assessed by trypan blue dye exclusion, before and after completing the injection schedule (viability pre-injection = viability post injection ±5%). The tumour inhibition data was analysed using the 2-tailed Student's *t*-test.

## RESULTS

### The alpha-v group monoclonal antibodies react with integrin αv-chain

Antibody screening by ELISA on purified αvβ3 and αIIbβ3 revealed five clones, 17E6, 20A9, 23G5, 14D9.F8, 10G2 which reacted specifically with αvβ3 (Table 1). We term these mAbs 'the alpha-v group'. All were IgG1/κ isotype. In the same ELISA assay, anti-integrin antibodies of known specificity against the αvβ3 complex (LM609), the αv chains (LM142), the αvβ5 complex (P5H9), the αIIbβ3 complex (CP8), the β3 chains (AP3), and the β1 chains (P4C10), reacted as predicted from the literature (Table 1). In ELISA on fixed cells ('CELISA'), with cells expressing αvβ3 and αvβ5 (M21), αvβ5 but no αvβ3 (UCLA-P3), neither αvβ3 nor αvβ5 (M21-L), and αIIbβ3 (M21-L-IIb), the alpha-v group showed a reaction pattern consistent with their recognition of the αv-integrin chain, and clearly distinct from a reaction with β3, β5,

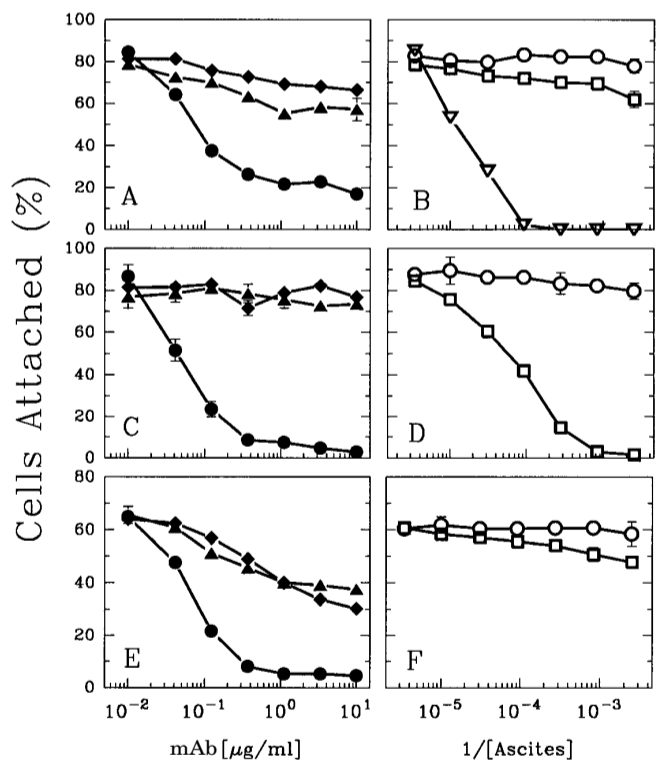

**Fig. 4.** 17E6 perturbs adhesion mediated by both αvβ3 and αvβ5 integrins. Purified monoclonal antibodies (mAb) or mouse ascites were co-incubated during cell attachment to vitronectin-coated substrates (5 µg ml<sup>-1</sup>). Cell lines (A,B) M21; (C,D) UCLA-P3; (E,F) WM793. Symbols represent the following antibodies (specificities): (●) 17E6 (αv); (▲) LM609 (αvβ3); (◆) 14D9.F8 (αv); (○) P4C10 (β1); (□) P5H9 (αvβ5); (▽) P5H9 + LM609 (dilution starting at 10 µg ml<sup>-1</sup>) (αvβ3+αvβ5).

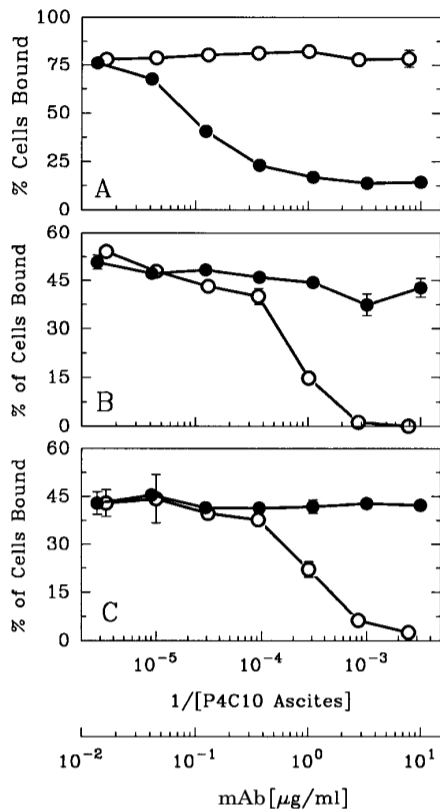

**Fig. 5.** 17E6 perturbs M21 adhesion to vitronectin but not to other matrix components. The inhibitory effect of 17E6 ( $\alpha v$ , ●) and P4C10 ( $\beta 1$ , ○) on M21 cell attachment to vitronectin (A), laminin (B) or collagen type I (C) was studied. 17E6 only blocked cell attachment on vitronectin-coated surfaces. Whilst P4C10 only blocked cell attachment on collagen type I and laminin.

$\beta 1$ , or other  $\alpha$ -chains (Table 1). The results corroborated the ELISA data with purified receptors. mAbs with specificities for  $\beta 3$  and  $\alpha IIb\beta 3$  clearly reacted differently from the alpha-v group. 17E6, 14D9.F8, 20A9 and 23G5 bound  $\alpha v\beta 3$  with similar apparent affinity, assessed by ELISA. 50% binding was achieved at  $\sim 10$ – $20 \text{ ng ml}^{-1}$  ( $\sim 50$ – $100 \text{ pM}$  - similar to LM609). 10G2 binding was similar to that of LM142, with about 10 times lower affinity. CP8 against  $\alpha IIb\beta 3$  and control antibody 14E2 (see below), showed minimal binding to  $\alpha v\beta 3$  at concentrations up to 100 nM (data not shown).

The ability of the alpha-v group to recognise native  $\alpha v$ -integrins was tested by FACS (Fig. 1; Table 2) and by immunoprecipitation from surface labelled cells (Fig. 2). In FACS analysis (Fig. 1), the  $\alpha v$ -expressing cells (M21) reacted strongly with 17E6, 14D9.F8, 20A9, 23G5, and with the  $\alpha v$ -defining antibodies LM142 and LM609, moderately with 10G2, and also with the control mAbs 14E2 and 21H6 and mAb 9.2.27. By contrast,  $\alpha v$ -deficient variant (M21-L) did not react with the alpha-v group, or with LM142 and LM609, but showed similar reactivity to that of M21 with 14E2, 21H6 and 9.2.27. M21-L has an intracellular pool of  $\beta 3$  subunits which were detected in FACS only when the cells were permeabilized (Table 2). In FACS analysis of M21-L4 ( $\alpha v$ -retransfected M21-L cells; Felding-Habermann et al., 1992), the alpha-v group gave reaction patterns as seen on M21. The control

vector transfectants, M21-L12 and the GpIIb transfectants, M21-L-IIb (Kieffer et al., 1991), showed no reactions with the alpha-v group (Table 1). UCLA-P3 adenocarcinoma reacted with the alpha-v group, with LM142 and P5H9, but not with LM609. UCLA-P3 does not express  $\beta 3$  (see Introduction). The melanoma WM793 had the same reaction pattern as M21. In immunoprecipitation screening of M21 cells, the alpha-v group gave the same immunoprecipitation patterns as LM142 (anti- $\alpha v$ ), and LM609 (anti- $\alpha v\beta 3$ ) (Fig. 2a). Under non-reducing conditions, a strong broad band was seen at  $\sim 95 \text{ kDa}$  and a weaker band at  $\sim 145 \text{ kDa}$ , with weak accompanying bands at  $\sim 100 \text{ kDa}$ , a pattern characteristic of surface labelled  $\alpha v\beta 3$  and  $\alpha v\beta 5$  integrins (Wayner et al., 1991). In comparison, on M21-L, none of the alpha-v group precipitated proteins (data from 17E6 and 20A9 are shown), and neither did LM142 or LM609 (Fig. 2c).  $\beta 1$ -specific antibodies gave similar precipitation patterns from M21 and M21-L. In M21-L, precipitation with anti- $\beta 3$  antibodies gave a band at  $\sim 95 \text{ kDa}$ , due to intracellular  $\beta 3$  labelled in permeable (possibly necrotic) cells. UCLA-P3 (Fig. 2d) gave no precipitate with LM609, but a  $\sim 95 \text{ kDa}/145 \text{ kDa}$  complex was precipitated, by the alpha-v group, by LM142, and by B5-1A9 (anti- $\beta 5$ ) (Fig. 2d). In summary, ELISA, CELISA, FACS analyses and immunoprecipitations gave consistent reaction patterns and strongly suggested that mAbs of the alpha-v group react with extracellular domains on human  $\alpha v$ -integrin chains.

**mAb 17E6 is a function blocking antibody**

**17E6 can modify initial cell attachment to  $\alpha v$ -ligands**

$\alpha v$ -integrins can function as receptors for vitronectin, so we screened the alpha-v group antibodies for their possible effects on cell attachment to vitronectin substrates. First, cells were analysed by FACS. Human melanoma and carcinoma cell lines reacted similarly with the alpha-v group. The reaction with 17E6 is summarised in Fig. 3. The attachment to vitronectin of cells reacting in FACS with 17E6 was strongly blocked by that antibody; other members of the alpha-v group were weaker (Fig. 4.) and the control antibody 14E2 was inactive (Fig. 3). The attachment of murine cell B16F10 on vitronectin was not affected by 17E6, and B16F10 did not react with 17E6 in FACS. As predicted (Cheresh and Harper, 1987), B16F10 attachment to human vitronectin was sensitive to micromolar concentrations of RGD-peptides, suggesting the presence of functional surface  $\alpha v$ -integrins, not recognized by 17E6 and the alpha-v group.

We investigated more closely the effect of 17E6 on cell attachment. 17E6 blocked M21 attachment ( $\sim 90\%$ ) to vitronectin with an  $IC_{50}$  of  $\sim 0.1 \mu g \text{ ml}^{-1}$  (Fig. 4a). We confirmed previous studies (Wayner et al., 1991) by showing that M21 attachment was poorly blocked by antibodies to  $\alpha v\beta 3$  (LM609) or  $\alpha v\beta 5$  (P5H9) alone, but was strongly blocked when both were added together (Fig. 4a,b). Anti- $\beta 1$  integrin antibodies (P4C10) had no effect on M21 attachment to vitronectin (Fig. 4b). The lines UCLA-P3 and WM793 attached to vitronectin and this attachment was blocked by 17E6, and also by the  $\alpha v\beta 5$ -specific (P5H9 on UCLA-P3) or  $\alpha v\beta 3$ -specific antibodies (LM609 on WM793) (Fig. 4c-f). This pattern of blocking corresponds to the surface patterns of integrin expression seen in FACS and by immunoprecipitation (e.g. Fig. 2D). UCLA-P3 expresses  $\alpha v\beta 5$  but no  $\alpha v\beta 3$



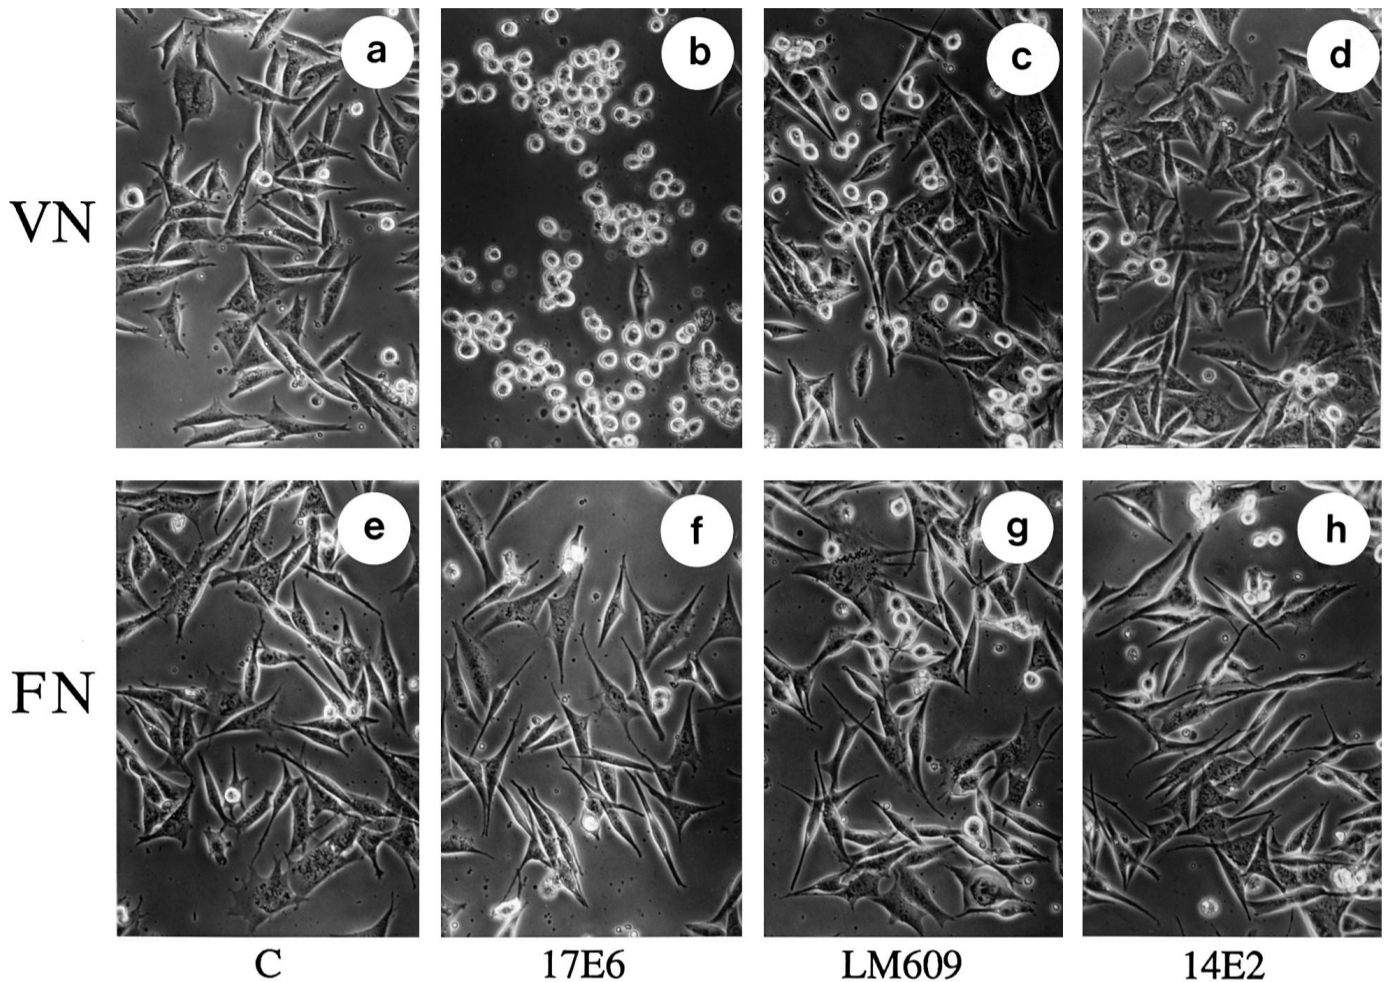

**Fig. 6.** 17E6 reverses established cell-vitronectin contacts. M21 melanoma were allowed to attach for 24 hours to surfaces coated with vitronectin (VN - upper row) or fibronectin (FN - lower row). The cells attached within 30 minutes and were well spread, and proliferating after 24 hours (a,e) when antibodies were added to the culture medium. With 17E6 (b,f), after 30 minutes on vitronectin cells rounded (b), while on fibronectin they remained spread (f). LM609 (c,g) and 14E2 (d,h) had little effect on either substrate. Antibody concentrations: (b)  $0.1 \mu\text{g ml}^{-1}$ ; (c,d,f-h)  $100 \mu\text{g ml}^{-1}$ .

(Wayner et al., 1991), while WM793 expresses high levels of  $\alpha v\beta 3$  (Table 2). On UCLA-P3 17E6 had an  $\text{IC}_{50}$  of  $\sim 30 \text{ ng ml}^{-1}$ . On WM793 it had an  $\text{IC}_{50}$  of  $\sim 60 \text{ ng ml}^{-1}$ , while for LM609 the  $\text{IC}_{50}$  was  $\sim 600 \text{ ng ml}^{-1}$ . The isotype-matched anti- $\alpha v$  antibody 14D9.F8 only weakly affected cell adhesion. The specificity of 17E6 was confirmed by its lack of effect on cell attachment to other matrix substrates. P4C10 (anti- $\beta 1$ ) abolished M21 attachment to laminin and collagen type I (Fig. 5). Cell adhesion to these substrates can be mediated by  $\beta 1$ -series integrins (Sonnenberg et al., 1988; Takada et al., 1987).

Taken together with the biochemical data, these results are consistent with the theory that 17E6 binds the  $\alpha v$ -chain of various integrin complexes and disturbs their interaction with their ligands.

#### 17E6 triggers reversal of established cell matrix interactions mediated by $\alpha v$ -integrins

We next investigated whether 17E6 could affect established cell-matrix interactions. When 17E6 was added to attached and spread M21 cells at low concentrations ( $\sim 0.1 \mu\text{g ml}^{-1}$ ), it

induced cell rounding after 0.5-1 hour at  $37^\circ\text{C}$  even after the cells had first attached for 24 hours (Fig. 6). The effect was reversible and after antibody removal the cells spread. By contrast, the antibodies LM609 and 14E2 affected morphology only slightly even at high concentrations ( $100 \mu\text{g ml}^{-1}$ ). The antibodies had no morphological effects even at  $100 \mu\text{g ml}^{-1}$  on fibronectin coated substrates (Fig. 6). M21-L4 (and other cells attached via  $\alpha v$ ) were similarly affected by 17E6 (not shown).

#### 17E6 blocks M21 tumour development in nude mice

We investigated the effect of the  $\alpha v$ -blocking antibody 17E6 on the subcutaneous development of M21 tumours in Balb/c nu/nu mice, which has been correlated with the cell surface expression of  $\alpha v$ -series integrins (see Introduction). We subcutaneously injected M21 cells with antibodies. 17E6 inhibited the development of M21 tumours (10/10 experiments: Fig. 7a; Table 3). At high doses ( $1 \times 10^6$  cells per animal: Fig. 7a), tumours took (10/16 animals) but tumour development was strongly inhibited. Similar inhibition was seen when 17E6 was



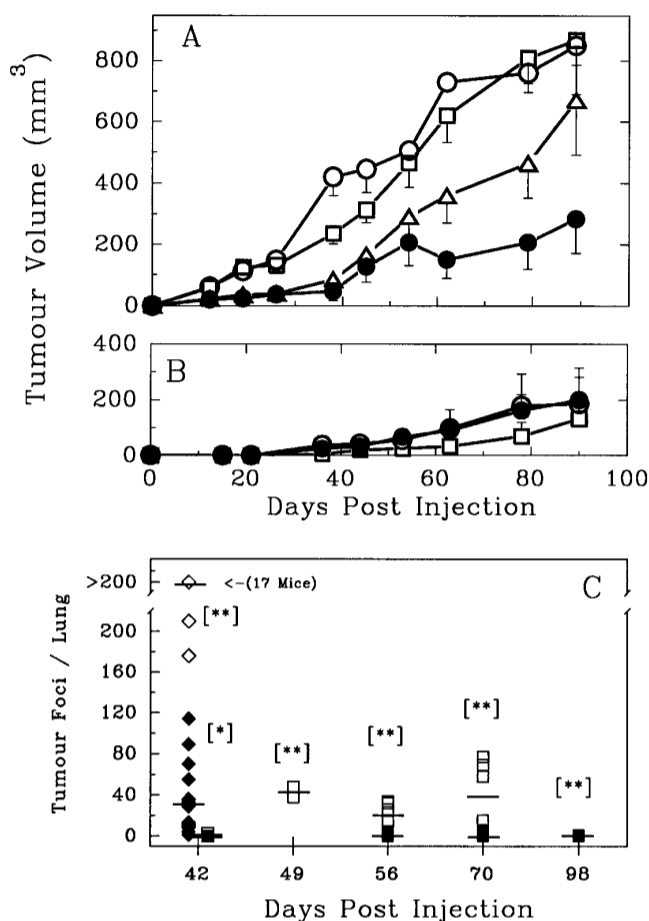

**Fig. 7.** M21 human melanoma development in Balb/c nude mice is modulated by  $\alpha$ v-integrins. (A,B) Effect of 17E6 on subcutaneous M21 development. M21 (A) or M21-L (B) were incubated with buffer (○), antibodies 17E6 (●), 14D9.F8 (△) or 14E2 (□) and injected subcutaneously into nude mice. With time, the tumour dimensions were measured and the volume plotted. Error bars show the s.e.m. ( $n=8$ ). (See also Table 4.) (C) Effect of  $\alpha$ v on M21 experimental metastasis.  $0.32 \times 10^6$  (◆, ■) or  $1 \times 10^6$  (◇, □) M21 (◆, ◇) or M21-L (■, □) cells were injected into the tail vein of nude mice. At the time shown, groups of animals were killed and the lungs examined for tumour nodules. All the M21 mice were killed on day 42. For the M21-L mice, 3-6 mice were killed at each point. The tumour burden after 6 weeks in the M21 mice was too high to count ( $>250$  per lung), so  $t$ -statistics are shown for the hypothesis that an M21-L group is from the same population as the control M21 group at 42 days at the  $<0.001$  (\*\*) or  $<0.02$  (\*) level. Where both  $0.32 \times 10^6$  and  $1 \times 10^6$  injected groups have the same level of significance, only one is shown. The bars show the mean tumour number for the groups.

injected intraperitoneally within 24 hours of the subcutaneous M21 implant. At low and intermediate cell doses ( $0.1-0.5 \times 10^6$  per animal), no tumour take was seen in the presence of 17E6 (0/32 animals). Weakly blocking antibodies against the  $\alpha$ v-chain (14D9.F8) and other control antibodies (14E2) showed effects on tumour development not significantly different from the buffer treated control after 6 weeks (Table 3). In 14E2 treated controls, take of tumours varied between experiments from 100-60%, but established tumours grew at the same rate

as the controls and, like them, the tumour-bearing animals had micro-metastases which grew into colonies when the lungs were brought into tissue culture. By contrast, 17E6 treated animals without primary tumours had no metastases in lungs, liver, kidney, spleen, colon, stomach, nor in thoracic or abdominal body cavities when killed at 6 months. The  $\alpha$ v-deficient cell line M21-L grew more slowly than M21 after subcutaneous injection, and was unaffected by 17E6 ( $0.1-1.0 \times 10^6$  cells per animal were tested:  $0.5 \times 10^6$  shown in Fig. 7b).

We also compared the growth of M21 and M21-L and the effect of the antibody 17E6 in a lung colonisation tail-vein injection model. M21 formed lung colonies in a dose dependent manner, while M21-L formed significantly fewer colonies which developed slowly (Fig. 7c; Table 4). Thus, tumour growth in the lungs was enhanced by the presence of cell surface  $\alpha$ v-integrins, and pre-incubation of M21 (but not M21-L) with 17E6 reduced the numbers of tumour foci that formed, while control antibodies had no significant effect (Table 4). The amount of foci formed when M21 was treated with 17E6 was similar to that achieved by M21-L cells in the same experiment.

In summary, the presence of  $\alpha$ v at the cell surface correlated with vigorous formation of M21 tumours both in subcutaneous and in experimental metastatic models. Antibody 17E6 suppressed tumour formation while the  $\alpha$ v-binding control, 14D9.F8, had little effect. In a lung colonisation model, the growth of M21 and the poor growth of M21-L corresponded to the subcutaneous growth pattern, and here too M21 growth was suppressed by 17E6, but not by control antibody. These data strengthen the link between  $\alpha$ v-integrins and the development of M21 human melanoma.

#### Anti-tumour activity of 17E6 is not due to antibody-mediated cytotoxicity

After observing its strong effects on attachment, morphology, and tumour development, we attempted to find the mechanism of 17E6-mediated tumour suppression. We tested 17E6 for cytotoxicity (Fig. 8). The kinetic of cell growth and the final cell densities achieved in culture were not greatly influenced by the presence of 17E6 or control antibody (Fig. 8a).

Nude mice are immune deficient. Of the immune competent cells which remain, macrophages and NK cells are the most likely to direct a cytotoxic, antibody-mediated response. To test the possibility that the antibodies were directing cellular cytotoxicity (ADCC), murine macrophages syngeneic with the mouse strain used to generate the alpha-v group were tested in ADCC against M21 cells. As effector cells murine brain macrophages (microglia) are especially effective mediators of ADCC (Sutter et al., 1991). The positive control, anti-ganglioside mAb 14.18G2a caused nearly complete lysis of M21 at  $<10^{-9}$  M, while 17E6 at up to  $10^{-7}$  M did not mediate ADCC (Fig. 8b).

To evaluate whether 17E6 might exert a cytostatic activity in the presence of effector cells, DNA synthesis of M21 microglial co-cultures was measured in the presence of the antibodies (Fig. 8c). At  $10^{-10}$  M 14.18G2a caused a  $\geq 90\%$  inhibition in [<sup>3</sup>H]thymidine incorporation, while 17E6 had no effect at up to  $10^{-7}$  M. 17E6 and 14E2 were IgG1/ $\kappa$  isotypes, and did not support complement mediated lysis on M21 cells (not shown).

Having tested the effects on cell proliferation, ADCC and

**Table 3. Inhibition of development of M21 tumour development by 17E6 mAb in Balb/c nu/nu mice subcutaneous growth assay**

| Cells and treatment | Tumour take | Tumour volume (mm <sup>3</sup> ) |           |            |         |            |            |
|---------------------|-------------|----------------------------------|-----------|------------|---------|------------|------------|
|                     |             | 30 Days                          |           |            | 90 Days |            |            |
|                     |             | Mean                             | (Range)   | <i>P</i> = | Mean    | (Range)    | <i>P</i> = |
| M21 + PBS           | 8/8         | 296                              | (124-758) | –          | 812     | (613-1090) | –          |
| M21 + 17E6          | 6/8         | 76                               | (0-232)   | 0.019*     | 275     | (0-614)    | 0.056*     |
| M21 + 14D9.F8       | 8/8         | 93                               | (32-238)  | 0.025*     | 687     | (381-1548) | 0.75**     |
| M21 + 14E2          | 8/8         | 269                              | (51-506)  | 0.78**     | 843     | (218-1065) | 0.64**     |

The experiment of Fig. 7A was analysed with Student's *t*-test for unpaired data at 30 days and 90 days of growth. Mean tumour volume and range of volumes is shown ( $1 \times 10^6$  cells injected per animal). *P* = *t*-test probability for the hypothesis that 'antibody treated cells develop into tumours at the same rate as PBS-treated controls'.

\*Significantly different from control.

\*\*Not significantly different.

AECDC, we examined whether the levels of DNA synthesis in M21 cells were affected by the mAbs. 17E6, 14E2, and LM609 at  $90 \mu\text{g ml}^{-1}$  ( $0.5 \mu\text{M}$ ) had no effect on thymidine incorporation at serum concentrations of 10, 1, or 0.1% (Fig. 9 shows 10%). DNA synthesis in M21-L, M21-L4 and M21-L-IIb cells was also unaffected by the antibodies. M21-L and M21-L-IIb react neither with 17E6 nor LM609, but do react with 14E2 (Fig. 1).

We concluded that the effects of 17E6 were specific to  $\alpha\text{v}$ -integrins, and not to toxic effects on the melanoma cells, nor to related antibody-mediated cellular cytotoxicity or growth inhibition.

## DISCUSSION

Tumour progression and metastasis are classically conditions where cells escape normal growth and adhesion controls and invade, migrate, attach and grow at inappropriate sites. Integrins are now known to control many cell adhesion events, and adhesion can in turn regulate mechanistically interwoven events including growth, differentiation, cellular movement

**Table 4. Inhibition of development of M21 tumour foci by 17E6 mAb in Balb/c nu/nu mice lung colonisation 'experimental metastasis' assay**

| Cells and treatment | Tumour take | Number of tumour foci |         |            |
|---------------------|-------------|-----------------------|---------|------------|
|                     |             | Mean $\pm$ s.e.m.     | (Range) | <i>P</i> = |
| M21 (Control)       | 8/8         | 61 $\pm$ 14           | (3-124) | –          |
| M21+17E6            | 7/8         | 8 $\pm$ 2.9           | (0-21)  | 0.003*     |
| M21+14E2            | 5/5         | 35 $\pm$ 15           | (16-86) | 0.3**      |
| M21-L               | 5/6         | 19 $\pm$ 9.9          | (0-60)  | 0.045*     |

Cells were harvested, incubated with antibody, washed and injected into the tail vein of nude mice. 7 weeks later the lung surfaces were examined. The numbers of foci that developed were analysed with Student's *t*-test for unpaired data. Mean number of foci and range of foci numbers is shown. Pre treatment with 17E6 significantly lowered the numbers of foci that developed, control antibody 14E2 did not. Similar numbers of foci developed following injection of  $0.5 \times 10^6$  cells per animal M21-L (lacking  $\alpha\text{v}$ ) or 17E6-treated M21 (where  $\alpha\text{v}$ -function was blocked). s.e.m. = standard error of the mean; *P* = *t*-test probability for the hypothesis that 'antibody treated cells develop the same number of foci as PBS-treated controls'.

\*Significantly different from control.

\*\*Not significantly different.

and the activity of protease networks, developmental events which are often reiterated in the metastatic cascade (Fidler, 1988; Liotta et al., 1991; Stetler Stevenson et al., 1993). In this study we describe antibodies directed against human  $\alpha\text{v}$ -series integrins one of which, 17E6, perturbs initial cell attachment, disrupts stable  $\alpha\text{v}$ -ligand interactions and interferes with human melanoma development in *in vivo* animal models. In biochemical analyses the alpha-v group antibodies showed reaction patterns closely related to LM142 a well defined antibody to human  $\alpha\text{v}$  - but distinct from the reaction patterns of  $\alpha\text{v}\beta 3$ -specific (LM609),  $\alpha\text{v}\beta 5$ -specific (P5H9) and from other defined anti-integrin antibodies. Thus, the 'alpha-v group' antibodies recognise the human  $\alpha\text{v}$ -integrin chain.

17E6 strongly perturbs cell attachment and spreading mediated by  $\alpha\text{v}$ . It blocks cell attachment with an  $\text{IC}_{50}$  of  $\sim 0.3$ - $1$  nM. By comparison, the peptidic blocker, GRGDSPK, has an  $\text{IC}_{50}$  of  $\sim 5 \mu\text{M}$ . Cell lines expressing mainly  $\alpha\text{v}\beta 3$  (WM793) or  $\alpha\text{v}\beta 5$  (UCLA-P3) are blocked by 17E6, as are cells expressing mainly  $\alpha\text{v}\beta 1$  (Marshall et al., 1995). We could confirm previous studies where initial attachment of M21 on vitronectin was blocked only by mixtures of anti- $\alpha\text{v}\beta 3$  and anti- $\alpha\text{v}\beta 5$  antibodies, implying that both  $\alpha\text{v}\beta 3$  and  $\alpha\text{v}\beta 5$  were involved (Wayner et al., 1991), yet 17E6 alone blocks M21 attachment to vitronectin. Thus, 17E6 powerfully inhibits several  $\alpha\text{v}$ -integrins. Antibodies that perturb function have been vital to our understanding of integrin function, but the  $\alpha\text{v}$ -field has lacked an effective class-specific blocking antibody. Only 13C2 (Davies et al., 1989), a weak blocker, had been described until recently, when 69-6-5 was reported, which blocks  $\alpha\text{v}$ -dependent cell attachment with an  $\text{IC}_{50}$  similar to 17E6 (Lehmann et al., 1994). The effects of 69-6-5 on established cell contacts and on tumour development have not yet been reported and comparison with 17E6 will be interesting.

Not only does 17E6 prevent the initial interaction of  $\alpha\text{v}$ -integrins with their ligands, but it also reverses well established interactions, causing rapid retraction of cells attached on vitronectin. The interactions of  $\alpha\text{v}\beta 3$  with vitronectin have been described as 'non-dissociable', an initial blockable interaction being followed by an 'irreversible' stabilizing reaction (Orlando and Chersesh, 1991). By contrast, 17E6 rapidly caused retraction and partial detachment of M21 and other cells from vitronectin substrates even after they had formed stable contacts (e.g. after 24 hours). Earlier studies have found that the growth of M21 tumours in nude mice is strongly correlated

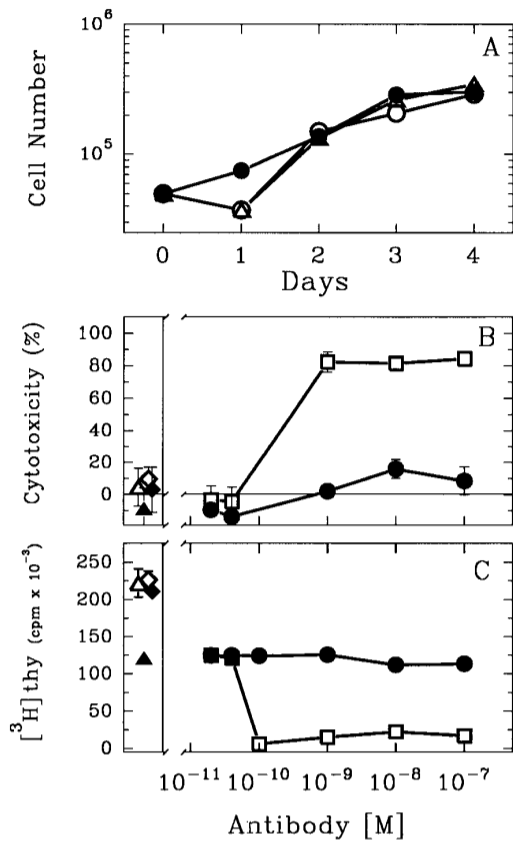

**Fig. 8.** 17E6 is not cytotoxic. (A) Effect of 17E6 on M21 cell proliferation.  $5 \times 10^4$  M21 were seeded in DMEM/FCS with carrier ( $\circ$ ), or in the presence of  $50 \mu\text{g ml}^{-1}$  antibodies 17E6 ( $\bullet$ ) or 14E2 ( $\triangle$ ) and the cell numbers were counted daily. Kinetics and saturation density of proliferation are unaffected by the antibodies. (B) 17E6-dependent lysis of M21 cells by microglial cells. Thymidine labelled M21 cells were mixed with Balb/c-derived microglial brain macrophages, serially diluted antibodies were added, and following incubation, thymidine associated with the nuclei of M21 cells was measured. Controls: ( $\triangle$ ) M21 cells alone; ( $\blacklozenge$ ) M21 + 17E6 (100 nM); ( $\diamond$ ) M21+14.18G2a; ( $\blacktriangle$ ) M21 + microglia. Mean  $\pm$  s.d. ( $n=6$ ). Experimental: ( $\bullet$ ) M21 + microglia + 17E6; ( $\square$ ) M21 + microglia + 14.18G2a. 17E6 did not induce antibody-dependent cell lysis. Mean  $\pm$  s.d. ( $n=3$ ). (C) 17E6-dependent cytostasis of M21 cells by microglial cells. M21 cells were incubated with microglial cells and serially diluted antibody, and then pulsed with [ $^3\text{H}$ ]thymidine to measure DNA synthesis. Thymidine incorporation ( $^3\text{H}$ )thy was measured. Symbols as in B. Note the cytostatic activity of the effector cells alone ( $\blacktriangle$ ). Microscopical observation of the assay showed that in regions of homogeneous distribution of microglial cells at 14.18G2a  $>10^{-10}$  M no M21 cells survived.

with expression of  $\alpha v$ -integrins (Felding-Habermann et al., 1992; Sanders et al., 1992). As 17E6 could modulate stable  $\alpha v$ -ligand interactions and its action was long lasting we examined its effect on tumour development. 17E6 blocked the development of subcutaneous M21 tumours in nude mice. In addition,  $\alpha v$  supported and 17E6 inhibited the development of M21 as lung colonies. We could also show that M21-L tumours developed more slowly than M21, and were unaffected by antibody 17E6. We have thus independently confirmed the studies of Felding-Habermann et al. and underlined the importance of  $\alpha v$ -integrins in the development of the M21 tumour.

Is not the drastic effect of a single subcutaneous antibody injection on long-term tumour development a surprise? In vitro 17E6 effects continued for  $>24$  hours following wash-out, suggesting that antibody endocytosis and destruction were slow. Given a mouse volume of 5-20 ml, the initial antibody concentration we used in vivo was 50-10 nM, an order of magnitude excess over the concentration necessary for reversing cell-ligand interactions in vitro. 17E6 is syngeneic for the treated animals and the half life of murine IgG1 is 20-200 hours (Tao and Morrison, 1989; Habu et al., 1985). Thus, the  $\text{IC}_{50}$  for reversing M21-ligand interaction could be exceeded for at least 100 hours in this model (i.e. 5 half-lives). RGD-peptides which block  $\alpha v$ -integrins have also been used to modulate tumour development. In the B16F10-C57bl/6 murine melanoma model, coinjected peptides inhibited the development of pulmonary tumours (Humphries et al., 1986; Hardan et al., 1993). With the same assumptions as for 17E6,  $\sim 100 \mu\text{M}$  RGD-peptide was present (Hardan et al., 1993), some two orders of magnitude over the dose required to block cell attachment to vitronectin. However, RGDS has a short serum half-life of 8 minutes (Humphries et al., 1988). As a general therapeutic goal, it might be preferable to generate long lived blockers for suppressing tumour development.

How might 17E6 affect tumour development? As it does not react with murine cells, it acts on the tumour cells and we can exclude effects on tumour angiogenesis (Brooks et al., 1994a,b). The only effects of 17E6 we can identify are: (a) its binding to the extracellular domain of  $\alpha v$ -integrins; and (b) its ability to perturb  $\alpha v$ -mediated cellular interactions. We have excluded most sources of antibody-mediated cellular killing available to a nude mouse. And, most revealingly, 14D9.F8, a matched control antibody that binds  $\alpha v$  but only weakly affects function of  $\alpha v\beta 3$  and  $\alpha v\beta 5$  integrins, does not affect tumour development. 17E6 itself did not chronically or acutely affect M21 cell growth and viability. In vitro it did not affect DNA synthesis, it did not mediate complement fixation, and it did not mediate syngeneic macrophage-mediated cytotoxicity or cytostasis. Nevertheless, M21 cells were sensitive to ADCC for they were effectively killed by microglial cells in the presence of control mAb 14.18G2a. Antibodies of the IgG1 isotype (like 17E6) can mediate murine macrophage ADCC (Herlyn et al., 1985a). It is possible that the number of  $\alpha v$  sites expressed per M21 cell may be below the critical threshold for ADCC to occur (Herlyn et al., 1985b). Macrophages in contrast to other myeloid or lymphocytic effector cells express all three classes of Fc receptors. Therefore, the data also argue against ADCC by effector cells other than macrophages as the mechanism of inhibition of tumour growth. Non-specific killing can be excluded as the antibodies were endotoxin free. We cannot exclude the possibility that NK cell mediated killing is activated by 17E6, but if so it is far more weakly activated by the syngeneic isotype- and specificity-matched control antibodies we used.

Since the proliferation of M21 cells was not affected by anti- $\alpha v$  antibodies, we conclude that 17E6 probably acts by modulating the function of  $\alpha v$ -integrins. Functions which 17E6 might block, and where  $\alpha v$  might participate, include cell adhesion, interaction with soluble matrix components (Seftor et al., 1992), modulation of a protease/protease inhibitor network (Gehlsen et al., 1992; de Boer et al., 1993), stimulating cell movement (Seftor et al., 1992; Gehlsen et al., 1992),

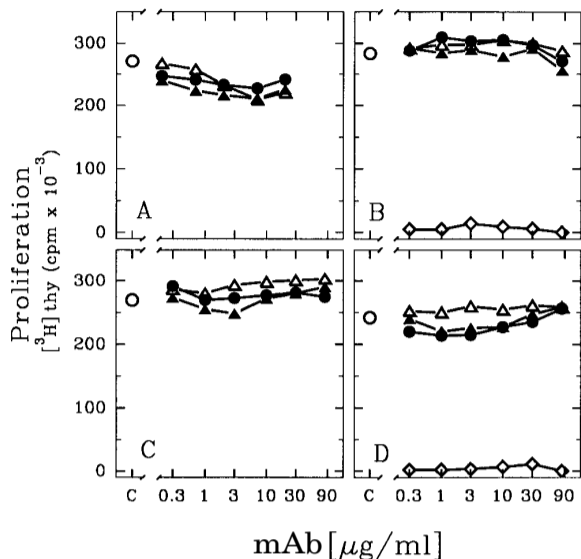

**Fig. 9.** 17E6 does not inhibit DNA synthesis in vitro by M21 cells. Cell lines (A) M21; (B) M21-L; (C) M21-L4; (D) M21-L-Ilb were cultured in the presence of the antibodies 17E6 (●), LM609 (▲) or 14E2 (△) at the concentrations indicated, or in culture medium alone (○). In (B) and (D), the routine positive control, tumouricidal taxol (◇) is shown. After 48 hours, the cells were pulsed with [<sup>3</sup>H]thymidine and the incorporated radioactivity was measured. The antibodies did not inhibit DNA synthesis. Taxol completely suppressed it (cf. Fig. 8: 90 µg ml<sup>-1</sup>, mAb = 600 nM).

affecting receptor internalisation (Wickham et al., 1993; Panetti and McKeown Longo, 1993b), but which if any is involved remains a matter for further experimentation.

In conclusion, a suite of monoclonal antibodies against the human  $\alpha v$ -integrin chain was developed. One, 17E6, both blocks and reverses  $\alpha v$ -mediated processes in vitro. It also blocks  $\alpha v$ -dependent human melanoma development in nude mice. Brooks et al. (1994b) recently showed that blocking of  $\alpha v\beta 3$  on tumour-invasive blood vessels induces endothelial apoptosis; conceivably  $\alpha v$ -bearing tumour cells might also be so affected. If so,  $\alpha v$ -integrins would be especially interesting targets: reagents that block  $\alpha v$ -integrins might act as double-edged weapons in tumour therapy, striking simultaneously at the developing tumour and at its blood supply.

This study was partially supported by 'Centro de Desarrollo Tecnológico e Industrial' (CDTI- Spain. Project number 930200). We are very grateful to Drs K. Reuss, R. Dunker and W. Brümmer for bulk hybridoma culture and purification and detoxification of the antibodies, and to Ms M. H. Nowee, Mr T. Löbig, Ms F. Araque, Ms C. Calvis, Ms G. Hormel, Mr J. Schmidt, Ms B. Weber, Mr N. Bahl, and Ms S. Nick for excellent technical assistance. Dr I. Hart and John Marshall (ICRF London), Dr L. Sorokin (MPI, Erlangen) and Dr D. A. Cheresh (Scripps, La Jolla) provided stimulating discussion and access to unpublished data, and Dr G. A. Luckenbach (E. Merck) provided all this, and continuous encouragement. We also thank the colleagues who generously gave us access to reagents and cells.

## REFERENCES

- Albelda, S. M., Mette, S. A., Elder, D. E., Stewart, R., Damjanovich, L., Herlyn, M. and Buck, C. A. (1990). Integrin distribution in malignant melanoma: association of the beta 3 subunit with tumor progression. *Cancer Res.* **50**, 6757-6764.
- Brooks, P. C., Clark, R. A. and Cheresh, D. A. (1994a). Requirement of vascular integrin alpha v beta 3 for angiogenesis. *Science* **264**, 569-571.
- Brooks, P. C., Montgomery, A. M. P., Rosenfeld, M., Reisfeld, R. A., Hu, T., Klier, G. and Cheresh, D. A. (1994b). Integrin  $\alpha 3\beta 3$  antagonists promote tumor regression by inducing apoptosis of angiogenic blood vessels. *Cell* **79**, 1157-1164.
- Buck, C., Albelda, S., Damjanovich, L., Edelman, J., Shih, D. T. and Solowska, J. (1990). Immunohistochemical and molecular analysis of beta 1 and beta 3 integrins. *Cell Diff. Dev.* **32**, 189-202.
- Busk, M., Pytela, R. and Sheppard, D. (1992). Characterization of the integrin alpha v beta 6 as a fibronectin-binding protein. *J. Biol. Chem.* **267**, 5790-5796.
- Carter, W. G., Wayner, E. A., Bouchard, T. S. and Kaur, P. (1990). The role of integrins alpha 2 beta 1 and alpha 3 beta 1 in cell-cell and cell-substrate adhesion of human epidermal cells. *J. Cell Biol.* **110**, 1387-1404.
- Chan, B. M. and Hemler, M. E. (1993). Multiple functional forms of the integrin VLA-2 can be derived from a single alpha 2 cDNA clone: interconversion of forms induced by an anti-beta 1 antibody. *J. Cell Biol.* **120**, 537-543.
- Charo, I. F., Nannizzi, L., Smith, J. W. and Cheresh, D. A. (1990). The vitronectin receptor alpha v beta 3 binds fibronectin and acts in concert with alpha 5 beta 1 in promoting cellular attachment and spreading on fibronectin. *J. Cell Biol.* **111**, 2795-2800.
- Cheng, Y. F., Clyman, R. I., Enestein, J., Waleh, N., Pytela, R. and Kramer, R. H. (1991). The integrin complex alpha v beta 3 participates in the adhesion of microvascular endothelial cells to fibronectin. *Exp. Cell Res.* **194**, 69-77.
- Cheresh, D. A. and Harper, J. R. (1987). Arg-Gly-Asp recognition by a cell adhesion receptor requires its 130-kDa alpha subunit. *J. Biol. Chem.* **262**, 1434-1437.
- Cheresh, D. A. and Spiro, R. C. (1987). Biosynthetic and functional properties of an Arg-Gly-Asp-directed receptor involved in human melanoma cell attachment to vitronectin, fibrinogen, and von Willebrand factor. *J. Biol. Chem.* **262**, 17703-17711.
- Cheresh, D. A., Pytela, R., Piersbacher, M. D., Klier, F. G., Ruoslahti, E. and Reisfeld, R. A. (1987). An Arg-Gly-Asp-directed receptor on the surface of human melanoma cells exists in a divalent cation-dependent functional complex with the disialoganglioside GD2. *J. Cell Biol.* **105**, 1163-1173.
- Cheresh, D. A., Smith, J. W., Cooper, H. M. and Quaranta, V. (1989). A novel vitronectin receptor integrin (alpha v beta x) is responsible for distinct adhesive properties of carcinoma cells. *Cell* **57**, 59-69.
- Cheresh, D. A. (1991). Structure, function and biological properties of integrin alpha v beta 3 on human melanoma cells. *Cancer Metast. Rev.* **10**, 3-10.
- Chuntharapai, A., Bodary, S., Horton, M. and Kim, K. J. (1993). Blocking monoclonal antibodies to alpha V beta 3 integrin: a unique epitope of alpha V beta 3 integrin is present on human osteoclasts. *Exp. Cell Res.* **205**, 345-352.
- Danen, E. H., van Muijen, G. N., van de Wiel van Kemenade, E., Jansen, K. F., Ruiter, D. J. and Figdor, C. G. (1993). Regulation of integrin-mediated adhesion to laminin and collagen in human melanocytes and in non-metastatic and highly metastatic human melanoma cells. *Int. J. Cancer* **54**, 315-321.
- Davies, J., Warwick, J., Totty, N., Philp, R., Helfrich, M. and Horton, M. (1989). The osteoclast functional antigen, implicated in the regulation of bone resorption, is biochemically related to the vitronectin receptor. *J. Cell Biol.* **109**, 1817-1826.
- de Boer, H. C., de Groot, P. G., Bouma, B. N. and Preissner, K. T. (1993). Ternary vitronectin-thrombin-antithrombin III complexes in human plasma. Detection and mode of association. *J. Biol. Chem.* **268**, 1279-1283.
- Delwel, G. O., Hogervorst, F., Kuikman, I., Paulsson, M., Timpl, R. and Sonnenberg, A. (1993). Expression and function of the cytoplasmic variants of the integrin alpha 6 subunit in transfected K562 cells. Activation-dependent adhesion and interaction with isoforms of laminin. *J. Biol. Chem.* **268**, 25865-25875.
- Denhardt, D. T. and Guo, X. (1993). Osteopontin: a protein with diverse functions. *FASEB J.* **7**, 1475-1482.
- Diamond, M. S. and Springer, T. A. (1994). The dynamic regulation of integrin adhesiveness. *Curr. Biol.* **4**, 506-517.
- Etoh, T., Byers, H. R. and Mihm, M. C. J. (1992). Integrin expression in malignant melanoma and their role in cell attachment and migration on extracellular matrix proteins. *J. Dermatol.* **19**, 841-846.
- Felding-Habermann, B., Mueller, B. M., Romerdahl, C. A. and Cheresh,

- D. A. (1992). Involvement of integrin alpha V gene expression in human melanoma tumorigenicity. *J. Clin. Invest.* **89**, 2018-2022.
- Fidler, I. J.** (1988). Origin of cancer metastases and its implications for therapy. *Isr. J. Med. Sci.* **24**, 456-463.
- Furihata, K., Nugent, D. J., Bissonette, A., Aster, R. H. and Kunicki, T. J.** (1987). On the association of the platelet-specific alloantigen, Pena, with glycoprotein IIIa. Evidence for heterogeneity of glycoprotein IIIa. *J. Clin. Invest.* **80**, 1624-1630.
- Gehlsen, K. R., Davis, G. E. and Sriramarao, P.** (1992). Integrin expression in human melanoma cells with differing invasive and metastatic properties. *Clin. Exp. Metast.* **10**, 111-120.
- Goodman, S. L., Aumailley, M. and von der Mark, H.** (1991). Multiple cell surface receptors for the short arms of laminin: alpha1β1 integrin and RGD-dependent proteins mediate cell attachment only to domains III in murine tumour laminin. *J. Cell Biol.* **113**, 931-941.
- Haba, S., Ovary, Z. and Nisonoff, A.** (1985). Clearance of IgE from serum of normal and hybridoma-bearing mice. *J. Immunol.* **134**, 3291-3297.
- Hardan, I., Weiss, L., Hershkoviz, R., Greenspoon, N., Alon, R., Cahalon, L., Reich, S., Slaviv, S. and Lider, O.** (1993). Inhibition of metastatic cell colonization in murine lungs and tumor-induced morbidity by non-peptidic Arg-Gly-Asp mimetics. *Int. J. Cancer* **55**, 1023-1028.
- Harel, W., Shau, H., Hadley, C. G., Morgan, A. C. Jr, Reisfeld, R. A., Cheresch, D. A. and Mitchell, M. S.** (1990). Increased lysis of melanoma by in vivo-elicited human lymphokine-activated killer cells after addition of antiganglioside antibodies in vitro. *Cancer Res.* **50**, 6311-6315.
- Harlow, E. and Lane, D.** (1988). *Antibodies - a Laboratory Manual*. Cold Spring Harbor: Cold Spring Harbor Laboratory Press.
- Hart, I. R., Birch, M. and Marshall, J. F.** (1991). Cell adhesion receptor expression during melanoma progression and metastasis. *Cancer Metast. Rev.* **10**, 115-128.
- Herlyn, D., Herlyn, M., Steplewski, Z. and Koprowski, H.** (1985a). Monoclonal anti-human tumor antibodies of six isotypes in cytotoxic reactions with human and murine effector cells. *Cell Immunol.* **92**, 105-114.
- Herlyn, D., Powe, J., Ross, A. H., Herlyn, M. and Koprowski, H.** (1985b). Inhibition of human tumor growth by IgG2A monoclonal antibodies correlates with antibody density on tumor cells. *J. Immunol.* **134**, 1300-1304.
- Herlyn, D., Iliopoulos, D., Jensen, P. J., Parmiter, A., Baird, J., Hotta, H., Adachi, K., Ross, A. H., Jambrosic, J., Koprowski, H. et al.** (1990). In vitro properties of human melanoma cells metastatic in nude mice. *Cancer Res.* **50**, 2296-2302.
- Humphries, M. J., Olden, K. and Yamada, K. M.** (1986). A synthetic peptide from fibronectin inhibits experimental metastasis of murine melanoma cells. *Science* **233**, 467-470.
- Humphries, M. J., Yamada, K. M. and Olden, K.** (1988). Investigation of the biological effects of anti-cell adhesive synthetic peptides that inhibit experimental metastasis of B16-F10 murine melanoma cells. *J. Clin. Invest.* **81**, 782-790.
- Hynes, R. O.** (1992). Integrins: versatility, modulation, and signaling in cell adhesion. *Cell* **69**, 11-25.
- Kazal, L. A., Ansel, S., Miller, O. P. and Tocantins, L. M.** (1963). The preparation and some properties of fibrinogen precipitated from human plasma by glycine. *Proc. Soc. Exp. Biol. Med.* **113**, 989-994.
- Kieffer, N., Fitzgerald, L. A., Wolf, D., Cheresch, D. A. and Phillips, D. R.** (1991). Adhesive properties of the beta 3 integrins: comparison of GP IIb-IIIa and the vitronectin receptor individually expressed in human melanoma cells. *J. Cell Biol.* **113**, 451-461.
- Korhonen, M., Ylänne, J., Laitinen, L., Cooper, H. M., Quaranta, V. and Virtanen, I.** (1991). Distribution of the alpha 1-alpha 6 integrin subunits in human developing and term placenta. *Lab. Invest.* **65**, 347-356.
- Landegren, U.** (1984). Measurement of cell numbers by means of the endogenous enzyme hexosaminidase. Applications to detection of lymphokines and cell surface antigens. *J. Immunol. Meth.* **67**, 379-388.
- Lehmann, M., Rabenandrasana, C., Tamura, R., Lissitzky, J., Quaranta, V., Pichon, J. and Marvaldi, J.** (1994). A monoclonal antibody inhibits adhesion to fibronectin and vitronectin of a colon carcinoma cell line and recognizes the integrins alpha v beta 3, alpha v beta 5, and alpha v beta 6. *Cancer Res.* **54**, 2102-2107.
- Lessey, B. A., Damjanovich, L., Coutifaris, C., Castelbaum, A., Albelda, S. M. and Buck, C. A.** (1992). Integrin adhesion molecules in the human endometrium. Correlation with the normal and abnormal menstrual cycle. *J. Clin. Invest.* **90**, 188-195.
- Liotta, L. A., Steeg, P. S. and Stetler-Stevenson, W. G.** (1991). Cancer metastasis and angiogenesis: an imbalance of positive and negative regulation. *Cell* **64**, 327-336.
- Marshall, J. F., Nesbitt, S. A., Helfrich, M. H., Horton, M. A., Polakova, K. and Hart, I. R.** (1991). Integrin expression in human melanoma cell lines: heterogeneity of vitronectin receptor composition and function. *Int. J. Cancer* **49**, 924-931.
- Marshall, J. F., Rutherford, D. C., McCartney, A. C. E., Goodman, S. L., Mitjans, F. C. and Hart, I. R.** (1995). αvβ1 is a receptor for vitronectin and fibrinogen, and acts with α5β1 to mediate spreading on fibronectin. *J. Cell Sci.* **108**, 1227-1238.
- Melvaer, K. L. and Fystro, D.** (1982). Modified micromethod of the Limulus amoebocyte lysate assay for endotoxin. *Appl. Environ. Microbiol.* **43**, 493-494.
- Mosmann, T.** (1983). Rapid colorimetric assay for cellular growth and survival: application to proliferation and cytotoxicity assays. *J. Immunol. Meth.* **65**, 55-63.
- Moyle, M., Napier, M. A. and McLean, J. W.** (1991). Cloning and expression of a divergent integrin subunit beta 8. *J. Biol. Chem.* **266**, 19650-19658.
- Mujoo, K., Kipps, T. J., Yang, H. M., Cheresch, D. A., Wargalla, U., Sander, D. J. and Reisfeld, R. A.** (1989). Functional properties and effect on growth suppression of human neuroblastoma tumors by isotype switch variants of monoclonal antiganglioside GD2 antibody 14. 18. *Cancer Res.* **49**, 2857-2861.
- Natali, P. G., Nicotra, M. R., Bartolazzi, A., Cavaliere, R. and Bigotti, A.** (1993). Integrin expression in cutaneous malignant melanoma: association of the alpha 3/beta 1 heterodimer with tumor progression. *Int. J. Cancer* **54**, 68-72.
- Neff, N. T., Lowrey, C., Decker, C., Tovar, A., Damsky, C., Buck, C. and Horwitz, A. F.** (1982). A monoclonal antibody detaches embryonic skeletal muscle from extracellular matrices. *J. Cell Biol.* **95**, 654-666.
- Nesbitt, S., Nesbit, A., Helfrich, M. and Horton, M.** (1993). Biochemical characterization of human osteoclast integrins. Osteoclasts express alpha v beta 3, alpha 2 beta 1, and alpha v beta 1 integrins. *J. Biol. Chem.* **268**, 16737-16745.
- Orlando, R. A. and Cheresch, D. A.** (1991). Arginine-glycine-aspartic acid binding leading to molecular stabilization between integrin alpha v beta 3 and its ligand. *J. Biol. Chem.* **266**, 19543-19550.
- Panetti, T. S. and McKeown Longo, P. J.** (1993a). Receptor-mediated endocytosis of vitronectin is regulated by its conformational state. *J. Biol. Chem.* **268**, 11988-11993.
- Panetti, T. S. and McKeown Longo, P. J.** (1993b). The alpha v beta 5 integrin receptor regulates receptor-mediated endocytosis of vitronectin. *J. Biol. Chem.* **268**, 11492-11495.
- Pasqualini, R. and Hemler, M. E.** (1994). Contrasting roles for integrin beta 1 and beta 5 cytoplasmic domains in subcellular localization, cell proliferation, and cell migration. *J. Cell Biol.* **125**, 447-460.
- Paulsson, M., Aumailley, M., Deutzmann, R., Timpl, R., Beck, K. and Engel, J.** (1987). Laminin-nidogen complex extraction with chelating agents and structural characterization. *Eur. J. Biochem.* **166**, 11-19.
- Pignatelli, M., Cardillo, M. R., Hanby, A. and Stamp, G. W.** (1992). Integrins and their accessory adhesion molecules in mammary carcinomas: loss of polarization in poorly differentiated tumors. *Hum. Pathol.* **23**, 1159-1166.
- Poste, G., Doll, J., Hart, I. R. and Fidler, I. J.** (1980). In vitro selection of murine B16 melanoma variants with enhanced tissue-invasive properties. *Cancer Res.* **40**, 1636-1644.
- Pytela, R., Pierschbacher, M. D. and Ruoslahti, E.** (1985). A 125/115-kDa cell surface receptor specific for vitronectin interacts with the arginine-glycine-aspartic acid adhesion sequence derived from fibronectin. *Proc. Nat. Acad. Sci. USA* **82**, 5766-5770.
- Pytela, R., Pierschbacher, M. D., Ginsberg, M. H., Plow, E. F. and Ruoslahti, E.** (1986). Platelet membrane glycoprotein IIb/IIIa: member of a family of Arg-Gly-Asp-specific adhesion receptors. *Science* **231**, 1559-1562.
- Ruoslahti, E., Hayman, E. G., Pierschbacher, M. and Engvall, E.** (1982). Fibronectin: purification, immunochemical properties, and biological activities. *Meth. Enzymol.* **82A**, 803-831.
- Sanders, L. C., Felding-Habermann, B., Mueller, B. M. and Cheresch, D. A.** (1992). Role of alpha V integrins and vitronectin in human melanoma cell growth. *Cold Spring Harb. Symp. Quant. Biol.* **57**, 233-240.
- Seftor, R. E., Seftor, E. A., Gehlsen, K. R., Stetler-Stevenson, W. G., Brown, P. D., Ruoslahti, E. and Hendrix, M. J.** (1992). Role of the alpha v beta 3 integrin in human melanoma cell invasion. *Proc. Nat. Acad. Sci. USA* **89**, 1557-1561.
- Si, Z. and Hersey, P.** (1994). Immunohistological examination of the

- relationship between metastatic potential and expression of adhesion molecules and 'selectins' on melanoma cells. *Pathology* **26**, 6-15.
- Smith, J. W., Vestal, D. J., Irwin, S. V., Burke, T. A. and Cheresch, D. A.** (1990). Purification and functional characterization of integrin alpha v beta 5. An adhesion receptor for vitronectin. *J. Biol. Chem.* **265**, 11008-11013.
- Smith, J. W. and Cheresch, D. A.** (1988). The Arg-Gly-Asp binding domain of the vitronectin receptor. Photoaffinity cross-linking implicates amino acid residues 61-203 of the beta subunit. *J. Biol. Chem.* **263**, 18726-18731.
- Smith, J. W. and Cheresch, D. A.** (1990). Integrin (alpha v beta 3)-ligand interaction. Identification of a heterodimeric RGD binding site on the vitronectin receptor. *J. Biol. Chem.* **265**, 2168-2172.
- Sonnenberg, A., Modderman, P. W. and Hogervorst, F.** (1988). Laminin receptor on platelets is the integrin VLA-6. *Nature* **336**, 487-489.
- Sonnenberg, A.** (1993). Integrins and their ligands. *Curr. Top. Microbiol. Immunol.* **184**, 7-35.
- Stetler Stevenson, W. G., Aznavoorian, S. and Liotta, L. A.** (1993). Tumor cell interactions with the extracellular matrix during invasion and metastasis. *Annu. Rev. Cell Biol.* **9**, 541-573.
- Sutter, A., Hekmat, A. and Luckenbach, G. A.** (1991). Antibody-mediated tumor cytotoxicity of microglia. *Pathobiology* **59**, 254-258.
- Takada, Y., Wayner, E. A., Carter, W. G. and Hemler, M. E.** (1987). Extracellular matrix receptors, ECMRII and ECMRI, for collagen and fibronectin correspond to VLA-2 and VLA-3 in the VLA family of heterodimers. *J. Cell. Biochem.* **37**, 385-393.
- Tao, M. H. and Morrison, S. L.** (1989). Studies of aglycosylated chimeric mouse-human IgG. Role of carbohydrate in the structure and effector functions mediated by the human IgG constant region. *J. Immunol.* **143**, 2595-2601.
- Towbin, H., Staehelin, T. and Gordon, J.** (1979). Electrophoretic transfer of proteins from polyacrylamide gels to nitrocellulose sheets; procedure and some applications. *Proc. Nat. Acad. Sci. USA* **76**, 4350-4354.
- Wayner, E. A., Orlando, R. A. and Cheresch, D. A.** (1991). Integrins alpha v beta 3 and alpha v beta 5 contribute to cell attachment to vitronectin but differentially distribute on the cell surface. *J. Cell Biol.* **113**, 919-929.
- Wickham, T. J., Mathias, P., Cheresch, D. A. and Nemerow, G. R.** (1993). Integrins alpha v beta 3 and alpha v beta 5 promote adenovirus internalization but not virus attachment. *Cell* **73**, 309-319.
- Yatohgo, T., Izumi, M., Kashiwagi, H. and Hayashi, M.** (1988). Novel purification of vitronectin from human plasma by heparin affinity chromatography. *Cell Struct. Funct.* **13**, 281-292.
- Yoshinaga, I. G., Vink, J., Dekker, S. K., Mihm, M. C. Jr and Byers, H. R.** (1993). Role of alpha 3 beta 1 and alpha 2 beta 1 integrins in melanoma cell migration. *Melanoma Res.* **3**, 435-441.
- Zhang, Z., Morla, A. O., Vuori, K., Bauer, J. S., Juliano, R. L. and Ruoslahti, E.** (1993). The alpha v beta 1 integrin functions as a fibronectin receptor but does not support fibronectin matrix assembly and cell migration on fibronectin. *J. Cell Biol.* **122**, 235-242.

(Received 4 October 1994 - Accepted, in revised form, 12 May 1995)
